# Supplementary material for: Versatile palladium-catalyzed C–H olefination of (hetero)arenes at room temperature
Source: Royal Society of Chemistry journal article supplement (doi:10.1039/c4cc05827e), 2014-01-01

## *Supporting Information*

### **Versatile palladium-catalyzed C–H olefination of (hetero)arenes at room temperature**

*Zhijie She, Yang Shi, Yumin Huang, Yangyang Cheng, Feijie Song\* and Jingsong  
You\**

*Key Laboratory of Green Chemistry and Technology of Ministry of Education,  
College of Chemistry, and State Key Laboratory of Biotherapy, West China Hospital,  
West China Medical School, Sichuan University, 29 Wangjiang Road, Chengdu  
610064, PR China Fax: 86-28-85412203; E-mail: jsyou@scu.edu.cn;  
fsong@scu.edu.cn*

## Table of contents

|                                                                                                                               |     |
|-------------------------------------------------------------------------------------------------------------------------------|-----|
| I. General Remarks.....                                                                                                       | S3  |
| II. Optimization of the Pd-catalyzed direct C–H bond olefination of arenes at room temperature .....                          | S3  |
| III. General procedure for the Pd-catalyzed oxidative C–H/C–H cross-coupling of arenes with alkenes at room temperature.....  | S4  |
| IV. Typical procedure for the synthesis of <b>3a</b> .....                                                                    | S4  |
| V. General procedure for the Pd-catalyzed direct C–H bond olefination of heteroarenes at room temperature .....               | S5  |
| VI. General procedure for the Pd-catalyzed regioselective arylation of coumarins at room temperature .....                    | S5  |
| VII. General procedure for the Pd-catalyzed oxidative C–H/C–H cross-coupling of arenes with quinones at room temperature..... | S5  |
| VIII. Typical procedure for the synthesis of <b>7b</b> .....                                                                  | S6  |
| IX. Characterization of substances <b>3</b> , <b>6</b> , and <b>7</b> .....                                                   | S6  |
| X. References .....                                                                                                           | S19 |
| XI. Copies of $^1\text{H}$ , $^{13}\text{C}$ NMR and $^1\text{H}$ - $^1\text{H}$ NOESY spectra .....                          | S20 |

## I. General Remarks

NMR spectra were obtained on a Bruker AV II-400 ( $^1\text{H}$  NMR at 400 MHz and  $^{13}\text{C}$  NMR at 100 MHz). The  $^1\text{H}$  NMR chemical shifts were measured using  $\text{CDCl}_3$  as the internal reference ( $\text{CDCl}_3$ :  $\delta = 7.26$  ppm). The  $^{13}\text{C}$  NMR (100 MHz) chemical shifts were given using  $\text{CDCl}_3$  as the internal standard ( $\text{CDCl}_3$ :  $\delta = 77.16$  ppm). High resolution mass spectra (HR-MS) were obtained with a Waters-Q-TOF-Premier (ESI). Melting points were determined with XRC-1 and are uncorrected.

All reactions were carried out under an air atmosphere. All reagents were obtained from commercial suppliers and were used without further purification. Arenes, olefins, trifluoroacetic acid,  $\text{K}_2\text{S}_2\text{O}_8$ ,  $(\text{NH}_4)_2\text{S}_2\text{O}_8$  and  $\text{Na}_2\text{S}_2\text{O}_8$  were purchased from Chengdu Kelong Chemical Engineering Reagent (China) CO., Ltd.  $\text{Pd}(\text{OAc})_2$  and  $\text{PdCl}_2$  were purchased from Shanxi Kaida Chemical Engineering (China) CO., Ltd.

## II. Optimization of the Pd-catalyzed direct C–H bond olefination of arenes at room temperature

A sealed Schlenk tube with a magnetic stir bar was charged with palladium catalyst (0.03 mmol), oxidant (0.6 mmol), TFA, benzene **1a** (2.0 mL, 22.5 mmol) and methyl acrylate **2a** (27.0  $\mu\text{L}$ , 0.3 mmol) under air. After being stirred at room temperature for 12h or 24 h, the mixture was diluted with 10 mL of  $\text{CH}_2\text{Cl}_2$ , filtered through a celite pad, and washed with 10 mL of  $\text{CH}_2\text{Cl}_2$ . The filtrate was collected and evaporated. The residue was purified by column chromatography (petroleum ether/ethyl acetate = 20/1, v/v) on silica gel to provide the desired product **3a**.

**Table S1.** Optimization of the oxidative cross-coupling of benzene **1a** with methyl acrylate **2a**<sup>a</sup>

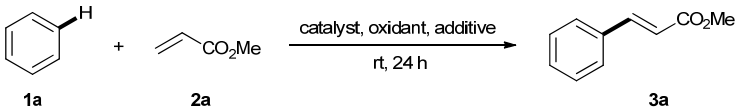

| Entry | Catalyst                  | Oxidant                               | Additive (equiv) | Yield (%) <sup>b</sup> |
|-------|---------------------------|---------------------------------------|------------------|------------------------|
| 1     | $\text{Pd}(\text{OAc})_2$ | $(\text{NH}_4)_2\text{S}_2\text{O}_8$ | none             | trace                  |

|                 |                            |                                                               |                  |           |
|-----------------|----------------------------|---------------------------------------------------------------|------------------|-----------|
| 2               | Pd(TFA) <sub>2</sub>       | (NH <sub>4</sub> ) <sub>2</sub> S <sub>2</sub> O <sub>8</sub> | none             | trace     |
| <b>3</b>        | <b>Pd(OAc)<sub>2</sub></b> | <b>(NH<sub>4</sub>)<sub>2</sub>S<sub>2</sub>O<sub>8</sub></b> | <b>TFA (5.0)</b> | <b>81</b> |
| 4               | Pd(TFA) <sub>2</sub>       | (NH <sub>4</sub> ) <sub>2</sub> S <sub>2</sub> O <sub>8</sub> | TFA (5.0)        | 72        |
| 5               | PdCl <sub>2</sub>          | (NH <sub>4</sub> ) <sub>2</sub> S <sub>2</sub> O <sub>8</sub> | TFA (5.0)        | trace     |
| 6               | Pd(OAc) <sub>2</sub>       | K <sub>2</sub> S <sub>2</sub> O <sub>8</sub>                  | TFA (5.0)        | 75        |
| 7               | Pd(OAc) <sub>2</sub>       | Na <sub>2</sub> S <sub>2</sub> O <sub>8</sub>                 | TFA (5.0)        | 61        |
| 8               | Pd(OAc) <sub>2</sub>       | NFSI                                                          | TFA (5.0)        | 57        |
| 9               | Pd(OAc) <sub>2</sub>       | O <sub>2</sub> (1.0 atm)                                      | TFA (5.0)        | 44        |
| 10 <sup>c</sup> | Pd(OAc) <sub>2</sub>       | (NH <sub>4</sub> ) <sub>2</sub> S <sub>2</sub> O <sub>8</sub> | TFA (5.0)        | 51        |
| 11              | Pd(OAc) <sub>2</sub>       | (NH <sub>4</sub> ) <sub>2</sub> S <sub>2</sub> O <sub>8</sub> | TFA (2.5)        | 42        |
| 12              | Pd(OAc) <sub>2</sub>       | (NH <sub>4</sub> ) <sub>2</sub> S <sub>2</sub> O <sub>8</sub> | TFA (10.0)       | 63        |
| 13 <sup>d</sup> | Pd(OAc) <sub>2</sub>       | (NH <sub>4</sub> ) <sub>2</sub> S <sub>2</sub> O <sub>8</sub> | TFA (5.0)        | 57        |
| 14 <sup>e</sup> | Pd(OAc) <sub>2</sub>       | (NH <sub>4</sub> ) <sub>2</sub> S <sub>2</sub> O <sub>8</sub> | TFA (5.0)        | 50        |
| 15 <sup>f</sup> | Pd(OAc) <sub>2</sub>       | (NH <sub>4</sub> ) <sub>2</sub> S <sub>2</sub> O <sub>8</sub> | TFA (5.0)        | n. r.     |

<sup>a</sup> Reaction conditions: methyl acrylate (0.30 mmol), arene (22.5 mmol, 75.0 equiv), Pd catalyst (0.03 mmol, 10 mol%), oxidant (2.0 equiv) and TFA at room temperature for 24 h under air. <sup>b</sup> Isolated yield. <sup>c</sup> The reaction time was 12 h. <sup>d</sup> Pd(OAc)<sub>2</sub> (0.015 mmol, 5 mol%) was used. <sup>e</sup> Arene (15 mmol, 50.0 equiv) was used. <sup>f</sup> Arene (0.9 mmol, 3.0 equiv) and CH<sub>2</sub>Cl<sub>2</sub> (2.0 mL) were used. n.r. = no reaction.

### III. General procedure for the Pd-catalyzed oxidative C–H/C–H cross-coupling of arenes with alkenes at room temperature

A sealed Schlenk tube with a magnetic stir bar was charged with Pd(OAc)<sub>2</sub> (6.7 mg, 0.03 mmol), (NH<sub>4</sub>)<sub>2</sub>S<sub>2</sub>O<sub>8</sub> (137.0 mg, 0.6 mmol), TFA (111.4 μL, 1.5 mmol), olefin (0.3 mmol) and arene (22.5 mmol) under air. After being stirred at room temperature for 24 h, the mixture was diluted with 10 mL of CH<sub>2</sub>Cl<sub>2</sub>, filtered through a celite pad, and washed with 10 mL of CH<sub>2</sub>Cl<sub>2</sub>. The filtrate was collected and evaporated. The residue was purified by column chromatography on silica gel to provide the desired product.

### IV. Typical procedure for the synthesis of 3a

A sealed Schlenk tube with a magnetic stir bar was charged with Pd(OAc)<sub>2</sub> (6.7 mg, 0.03 mmol), (NH<sub>4</sub>)<sub>2</sub>S<sub>2</sub>O<sub>8</sub> (137.0 mg, 0.6 mmol), TFA (111.4 μL, 1.5 mmol), methyl acrylate (27.0 μL, 0.3 mmol) and benzene (2.0 mL, 22.5 mmol) at room temperature

under air. After being stirred at room temperature for 24 h, the mixture was diluted with 10 mL of CH<sub>2</sub>Cl<sub>2</sub>, filtered through a celite pad, and washed with 10 mL of CH<sub>2</sub>Cl<sub>2</sub>. The filtrate was collected and evaporated. The residue was purified by column chromatography on silica gel (petroleum ether/ethyl acetate = 20/1, v/v) to provide **3a** as colorless liquid (39.3 mg, 81% yield).

#### **V. General procedure for the Pd-catalyzed direct C–H bond olefination of heteroarenes at room temperature**

A sealed Schlenk tube with a magnetic stir bar was charged with Pd(OAc)<sub>2</sub> (6.7 mg, 0.03 mmol), (NH<sub>4</sub>)<sub>2</sub>S<sub>2</sub>O<sub>8</sub> (137.0 mg, 0.6 mmol), TFA (111.4 μL, 1.5 mmol), olefin (0.6 mmol), heteroarene (0.3 mmol) and CH<sub>2</sub>Cl<sub>2</sub> (2.0 mL) under air. After being stirred at room temperature for 48 h, the mixture was diluted with 10 mL of CH<sub>2</sub>Cl<sub>2</sub>, filtered through a celite pad, and washed with 10 mL of CH<sub>2</sub>Cl<sub>2</sub>. The filtrate was collected and evaporated. The residue was purified by column chromatography on silica gel to provide the desired product.

#### **VI. General procedure for the Pd-catalyzed regioselective arylation of coumarins at room temperature**

A sealed Schlenk tube with a magnetic stir bar was charged with Pd(OAc)<sub>2</sub> (6.7 mg, 0.03 mmol), (NH<sub>4</sub>)<sub>2</sub>S<sub>2</sub>O<sub>8</sub> (137.0 mg, 0.6 mmol), TFA (111.4 μL, 1.5 mmol), coumarin (0.3 mmol), and arene (22.5 mmol) under air. After being stirred at room temperature for 24 h, the mixture was diluted with 10 mL of CH<sub>2</sub>Cl<sub>2</sub>, filtered through a celite pad, and washed with 10 mL of CH<sub>2</sub>Cl<sub>2</sub>. The filtrate was collected and evaporated. The residue was purified by column chromatography on silica gel to provide the desired product.

#### **VII. General procedure for the Pd-catalyzed oxidative C–H/C–H cross-coupling**

### of arenes with quinones at room temperature

A sealed Schlenk tube with a magnetic stir bar was charged with Pd(OAc)<sub>2</sub> (6.7 mg, 0.03 mmol), (NH<sub>4</sub>)<sub>2</sub>S<sub>2</sub>O<sub>8</sub> (137.0 mg, 0.6 mmol), TFA (111.4 μL, 1.5 mmol), quinone (0.3 mmol), and arene (22.5 mmol) under air. After being stirred at room temperature for 24 h, the mixture was diluted with 10 mL of CH<sub>2</sub>Cl<sub>2</sub>, filtered through a celite pad, and washed with 10 mL of CH<sub>2</sub>Cl<sub>2</sub>. The filtrate was collected and evaporated. The residue was purified by column chromatography on silica gel to provide the desired product.

### VIII. Typical procedure for the synthesis of **7b**

A sealed Schlenk tube with a magnetic stir bar was charged with Pd(OAc)<sub>2</sub> (6.7 mg, 0.03 mmol), (NH<sub>4</sub>)<sub>2</sub>S<sub>2</sub>O<sub>8</sub> (137.0 mg, 0.6 mmol), TFA (111.4 μL, 1.5 mmol), 1,4-naphthoquinone **5b** (47.4 mg, 0.3 mmol), and benzene (2.0 mL, 22.5 mmol) under air. After being stirred at room temperature for 24 h, the mixture was diluted with 10 mL of CH<sub>2</sub>Cl<sub>2</sub>, filtered through a celite pad, and washed with 10 mL of CH<sub>2</sub>Cl<sub>2</sub>. The filtrate was collected and evaporated. The residue was purified by column chromatography on silica gel (petroleum ether/CH<sub>2</sub>Cl<sub>2</sub> = 2/1, v/v) to provide **7b** as a yellow solid (66.1 mg, 94% yield).

### IX. Characterization of substances **3**, **6**, and **7**

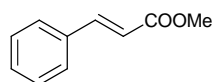

#### *trans*-Methyl cinnamate (**3a**)<sup>1</sup>

Pd(OAc)<sub>2</sub> (6.7 mg, 0.03 mmol), (NH<sub>4</sub>)<sub>2</sub>S<sub>2</sub>O<sub>8</sub> (137.0 mg, 0.6 mmol), TFA (111.4 μL, 1.5 mmol), methyl acrylate (27.0 μL, 0.3 mmol) and benzene (2.0 mL, 22.5 mmol) at room temperature for 24 h. Purification via column chromatography on silica gel (petroleum ether/ethyl acetate = 20/1, v/v) afforded **3a** as colorless liquid (39.3 mg,

81% yield).  $^1\text{H}$  NMR (400 MHz,  $\text{CDCl}_3$ ):  $\delta$  = 3.81 (s, 3H), 6.45 (d,  $J$  = 16.0 Hz, 1H), 7.39 (t,  $J$  = 3.2 Hz, 3H), 7.52-7.54 (m, 2H), 7.70 (d,  $J$  = 16.0 Hz, 1H) ppm.  $^{13}\text{C}$  NMR (100 MHz,  $\text{CDCl}_3$ ):  $\delta$  = 51.8, 118.0, 128.2, 129.0, 130.4, 134.6, 145.0, 167.6 ppm.

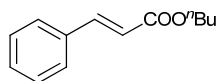

***trans*-Butyl cinnamate (3b)<sup>1</sup>**

$\text{Pd}(\text{OAc})_2$  (6.7 mg, 0.03 mmol),  $(\text{NH}_4)_2\text{S}_2\text{O}_8$  (137.0 mg, 0.6 mmol), TFA (111.4  $\mu\text{L}$ , 1.5 mmol), *n*-butyl acrylate (43.0  $\mu\text{L}$ , 0.3 mmol) and benzene (2.0 mL, 22.5 mmol) at room temperature for 24 h. Purification via column chromatography on silica gel (petroleum ether/ethyl acetate = 20/1, v/v) afforded **3b** as colorless liquid (50.1 mg, 82% yield).  $^1\text{H}$  NMR (400 MHz,  $\text{CDCl}_3$ ):  $\delta$  = 0.97 (t,  $J$  = 7.2 Hz, 3H), 1.40-1.49 (m, 2H), 1.66-1.73 (m, 2H), 4.22 (t,  $J$  = 6.8 Hz, 2H), 6.44 (d,  $J$  = 16.0 Hz, 1H), 7.38-7.39 (m, 3H), 7.52-7.54 (m, 2H), 7.68 (d,  $J$  = 16.0 Hz, 1H) ppm.  $^{13}\text{C}$  NMR (100 MHz,  $\text{CDCl}_3$ ):  $\delta$  = 13.9, 19.4, 31.0, 64.6, 118.5, 128.2, 129.0, 130.4, 134.7, 144.7, 167.3 ppm.

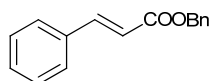

***trans*-Benzyl cinnamate (3c)<sup>2</sup>**

$\text{Pd}(\text{OAc})_2$  (6.7 mg, 0.03 mmol),  $(\text{NH}_4)_2\text{S}_2\text{O}_8$  (137.0 mg, 0.6 mmol), TFA (111.4  $\mu\text{L}$ , 1.5 mmol), benzyl acrylate (45.0  $\mu\text{L}$ , 0.3 mmol) and benzene (2.0 mL, 22.5 mmol) at room temperature for 24 h. Purification via column chromatography on silica gel (petroleum ether/ethyl acetate = 20/1, v/v) afforded **3c** as colorless liquid (60.3 mg, 84% yield).  $^1\text{H}$  NMR (400 MHz,  $\text{CDCl}_3$ ):  $\delta$  = 5.26 (s, 2H), 6.49 (d,  $J$  = 16.0 Hz, 1H), 7.34-7.43 (m, 8H), 7.51-7.54 (m, 2H), 7.74 (d,  $J$  = 16.0 Hz, 1H) ppm.  $^{13}\text{C}$  NMR (100 MHz,  $\text{CDCl}_3$ ):  $\delta$  = 66.5, 118.0, 128.3, 128.40, 128.42, 128.7, 129.0, 130.5, 134.5, 136.2, 145.3, 167.0 ppm.

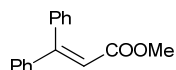

### **Methyl 3,3-diphenylacrylate (3d)<sup>1</sup>**

Pd(OAc)<sub>2</sub> (6.7 mg, 0.03 mmol), (NH<sub>4</sub>)<sub>2</sub>S<sub>2</sub>O<sub>8</sub> (137.0 mg, 0.6 mmol), TFA (111.4 μL, 1.5 mmol), methyl cinnamate (48.7 mg, 0.3 mmol) and benzene (2.0 mL, 22.5 mmol) at room temperature for 24 h. Purification via column chromatography on silica gel (petroleum ether/ethyl acetate = 20/1, v/v) afforded **3d** as colorless liquid (47.6 mg, 67% yield). <sup>1</sup>H NMR (400 MHz, CDCl<sub>3</sub>): δ = 3.53 (s, 3H), 6.29 (s, 1H), 7.13-7.17 (m, 2H), 7.21-7.28 (m, 5H), 7.31-7.32 (m, 3H) ppm. <sup>13</sup>C NMR (100 MHz, CDCl<sub>3</sub>): δ = 51.4, 116.9, 128.0, 128.3, 128.4, 128.5, 129.2, 129.6, 138.9, 140.9, 157.2, 166.5 ppm.

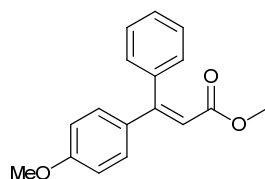

### **(E)-Methyl 3-(4-methoxyphenyl)-3-phenylacrylate (3e)<sup>3</sup>**

Pd(OAc)<sub>2</sub> (6.7 mg, 0.03 mmol), (NH<sub>4</sub>)<sub>2</sub>S<sub>2</sub>O<sub>8</sub> (137.0 mg, 0.6 mmol), TFA (111.4 μL, 1.5 mmol), (*E*)-methyl 3-(4-methoxyphenyl)acrylate (57.6 mg, 0.3 mmol) and benzene (2.0 mL, 22.5 mmol) at room temperature for 24 h. Purification via column chromatography on silica gel (petroleum ether/ethyl acetate = 20/1, v/v) afforded **3e** as a white solid (36.2 mg, 45% yield). <sup>1</sup>H NMR (400 MHz, CDCl<sub>3</sub>): δ = 3.60 (s, 3H), 3.82 (s, 3H), 6.32 (s, 1H), 6.84 (d, *J* = 8.8 Hz, 2H), 7.19-7.26 (m, 4H), 7.38-7.40 (m, 3H) ppm. <sup>13</sup>C NMR (100 MHz, CDCl<sub>3</sub>): δ = 51.3, 55.5, 113.9, 114.8, 128.0, 128.2, 129.2, 129.9, 133.3, 139.2, 157.0, 161.0, 166.7 ppm. HRMS (ESI<sup>+</sup>): calcd for C<sub>17</sub>H<sub>16</sub>NaO<sub>3</sub> [M+Na]<sup>+</sup> 291.0997, found 291.1001.



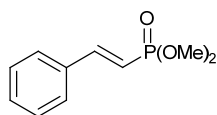

**(E)-Dimethyl styrylphosphonate (3f)**<sup>4</sup>

Pd(OAc)<sub>2</sub> (6.7 mg, 0.03 mmol), (NH<sub>4</sub>)<sub>2</sub>S<sub>2</sub>O<sub>8</sub> (137.0 mg, 0.6 mmol), TFA (111.4 μL, 1.5 mmol), dimethyl vinylphosphonate (36.0 μL, 0.3 mmol) and benzene (2 mL, 22.5 mmol) at room temperature for 24 h. Purification via column chromatography on silica gel (petroleum ether/ethyl acetate = 2/1, v/v) afforded **3f** as pale yellow liquid (46.2 mg, 73% yield). <sup>1</sup>H NMR (400 MHz, CDCl<sub>3</sub>): δ = 3.77 (s, 3H), 3.79 (s, 3H), 6.22 (t, *J* = 18.0 Hz, 1H), 7.38-7.40 (m, 3H), 7.49-7.59 (m, 3H) ppm. <sup>13</sup>C NMR (100 MHz, CDCl<sub>3</sub>): δ = 52.7 (d, *J* = 6.0 Hz), 112.4 (d, *J* = 192.0 Hz), 127.9, 129.0, 130.6, 134.8 (d, *J* = 23.0 Hz), 150.0 (d, *J* = 7.0 Hz) ppm.

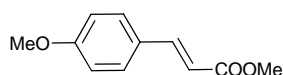

**(E)-Methyl 3-(4-methoxyphenyl)acrylate (3g)**<sup>5</sup>

Pd(OAc)<sub>2</sub> (6.7 mg, 0.03 mmol), (NH<sub>4</sub>)<sub>2</sub>S<sub>2</sub>O<sub>8</sub> (137.0 mg, 0.6 mmol), TFA (111.4 μL, 1.5 mmol), methyl acrylate (27.0 μL, 0.3 mmol) and anisole (2.4 mL, 22.5 mmol) at room temperature for 24 h. Purification via column chromatography on silica gel (petroleum ether/ethyl acetate = 20/1, v/v) afforded **3g** as a pale yellow solid (36.5 mg, 63% yield). <sup>1</sup>H NMR (400 MHz, CDCl<sub>3</sub>): δ = 3.79 (s, 3H), 3.84 (s, 3H), 6.31 (d, *J* = 16.0 Hz, 1H), 6.90 (d, *J* = 8.8 Hz, 2H), 7.48 (d, *J* = 8.8 Hz, 2H), 7.65 (d, *J* = 16.0 Hz, 1H) ppm. <sup>13</sup>C NMR (100 MHz, CDCl<sub>3</sub>): δ = 51.7, 55.5, 114.5, 115.4, 127.3, 129.9, 144.7, 161.5, 167.9 ppm.

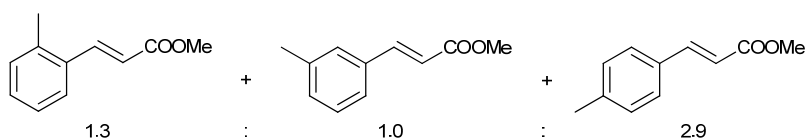

**Methyl (E)-3-(x-tolyl)acrylate (3h)**<sup>6a,6b</sup>

Pd(OAc)<sub>2</sub> (6.7 mg, 0.03 mmol), (NH<sub>4</sub>)<sub>2</sub>S<sub>2</sub>O<sub>8</sub> (137.0 mg, 0.6 mmol), TFA (111.4 μL, 1.5 mmol), methyl acrylate (27.0 μL, 0.3 mmol) and methylbenzene (2.4 mL, 22.5 mmol) at room temperature for 24 h. Purification via column chromatography on silica gel (petroleum ether/ethyl acetate = 20/1, v/v) afforded **3h** as pale yellow liquid (41.4 mg, 78% yield). The ratio of *o*/*m*/*p* was 1.3/1.0/2.9 as determined by <sup>1</sup>H NMR. <sup>1</sup>H NMR (400 MHz, CDCl<sub>3</sub>, a mixture of three isomers): δ = 2.37 (s, ArCH<sub>3</sub>), 2.44 (s, ArCH<sub>3</sub>), 3.799 (s, OCH<sub>3</sub>), 3.804 (s, OCH<sub>3</sub>), 3.81 (s, OCH<sub>3</sub>), 6.37 (d, *J* = 16.0 Hz, =CH), 6.40 (d, *J* = 16.0 Hz, =CH), 6.43 d, *J* = 16.0 Hz, =CH), 7.18-7.33 (m, ArH), 7.42 (d, *J* = 8.0 Hz, ArH), 7.55 (d, *J* = 7.6 Hz, ArH), 7.67 (d, *J* = 16.0 Hz, =CH), 7.99 (d, *J* = 16.0 Hz, =CH) ppm. <sup>13</sup>C NMR (100 MHz, CDCl<sub>3</sub>): δ = 19.9, 21.4, 21.5, 51.70, 51.74, 51.8, 116.8, 117.7, 119.0, 125.4, 126.4, 126.5, 128.2, 128.8, 128.9, 129.7, 130.1, 130.9, 131.2, 131.8, 133.5, 134.5, 137.7, 138.6, 140.8, 142.6, 145.0, 145.1, 167.55, 167.57, 167.7 ppm.

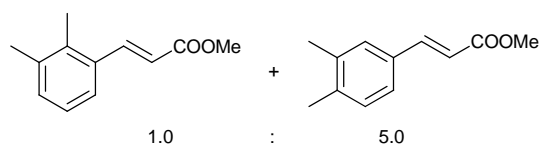

**(*E*)-Methyl 3-(2,3-dimethylphenyl)acrylate (3i-1) and (*E*)-methyl 3-(3,4-dimethylphenyl)acrylate (3i-2)**<sup>7</sup>

Pd(OAc)<sub>2</sub> (6.7 mg, 0.03 mmol), (NH<sub>4</sub>)<sub>2</sub>S<sub>2</sub>O<sub>8</sub> (137.0 mg, 0.6 mmol), TFA (111.4 μL, 1.5 mmol), methyl acrylate (27.0 μL, 0.3 mmol) and 1,2-dimethylbenzene (2.7 mL, 22.5 mmol) at room temperature for 24 h. Purification via column chromatography on silica gel (petroleum ether/ethyl acetate = 20/1, v/v) afforded the desired product as colorless liquid (42.2 mg, 74% yield). The ratio of **3i-1**/**3i-2** was 1.0/5.0 as determined by <sup>1</sup>H NMR. <sup>1</sup>H NMR (400 MHz, CDCl<sub>3</sub>, a mixture of two isomers): δ = 2.28 (s, CH<sub>3</sub>, major isomer), 2.31 (s, CH<sub>3</sub>, minor isomer), 2.33 (s, CH<sub>3</sub>, minor isomer), 3.80 (s, OCH<sub>3</sub>, major isomer), 3.82 (s, OCH<sub>3</sub>, minor isomer), 6.32 (d, *J* = 15.6 Hz, =CH, minor isomer), 6.40 (d, *J* = 16.0 Hz, =CH, major isomer), 7.09-7.19 (m, ArH, major+minor isomer), 7.28 (d, *J* = 1.6 Hz, ArH, major isomer), 7.30 (s, ArH, major isomer),

7.39 (d,  $J = 7.6$  Hz, ArH, minor isomer), 7.66 (d,  $J = 16.0$  Hz, =CH, major isomer), 8.09 (d,  $J = 15.6$  Hz, =CH, minor isomer) ppm.  $^{13}\text{C}$  NMR (100 MHz,  $\text{CDCl}_3$ ):  $\delta = 19.4, 19.85, 19.91, 20.7, 51.7, 116.6, 119.4, 124.6, 124.8, 125.8, 125.9, 129.1, 129.4, 129.9, 130.3, 131.7, 132.2, 133.8, 134.7, 136.2, 136.7, 137.2, 137.5, 139.6, 141.4, 143.8, 145.2, 167.6, 167.8$  ppm.

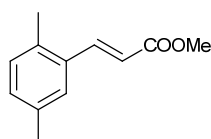

**(E)-Methyl 3-(2,5-dimethylphenyl)acrylate (3j)**<sup>8</sup>

$\text{Pd}(\text{OAc})_2$  (6.7 mg, 0.03 mmol),  $(\text{NH}_4)_2\text{S}_2\text{O}_8$  (137.0 mg, 0.6 mmol), TFA (111.4  $\mu\text{L}$ , 1.5 mmol), methyl acrylate (27.0  $\mu\text{L}$ , 0.3 mmol) and 1,4-dimethylbenzene (2.8 mL, 22.5 mmol) at room temperature for 24 h. Purification via column chromatography on silica gel (petroleum ether/ethyl acetate = 20/1, v/v) afforded **3j** as colorless liquid (37.7 mg, 66% yield).  $^1\text{H}$  NMR (400 MHz,  $\text{CDCl}_3$ ):  $\delta = 2.33$  (s, 3H), 2.39 (s, 3H), 3.81 (s, 3H), 6.35 (d,  $J = 16.0$  Hz, 1H), 7.090 (s, 1H), 7.093 (s, 1H), 7.36 (s, 1H), 7.96 (d,  $J = 16.0$  Hz, 1H) ppm.  $^{13}\text{C}$  NMR (100 MHz,  $\text{CDCl}_3$ ):  $\delta = 19.4, 21.1, 51.8, 118.7, 127.1, 130.9, 131.1, 133.3, 134.8, 135.9, 142.9, 167.7$  ppm.

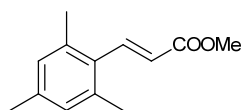

**(E)-Methyl 3-mesitylacrylate (3k)**<sup>9</sup>

$\text{Pd}(\text{OAc})_2$  (6.7 mg, 0.03 mmol),  $(\text{NH}_4)_2\text{S}_2\text{O}_8$  (137.0 mg, 0.6 mmol), TFA (111.4  $\mu\text{L}$ , 1.5 mmol), methyl acrylate (27.0  $\mu\text{L}$ , 0.3 mmol) and mesitylene (3.1 mL, 22.5 mmol) at room temperature for 24 h. Purification via column chromatography on silica gel (petroleum ether/ethyl acetate = 20/1, v/v) afforded **3k** as a pale yellow solid (38.1 mg, 62% yield).  $^1\text{H}$  NMR (400 MHz,  $\text{CDCl}_3$ ):  $\delta = 2.29$  (s, 3H), 2.33 (s, 6H), 3.82 (s, 3H),

6.06 (d,  $J = 16.4$  Hz, 1H), 6.90 (s, 2H), 7.85 (d,  $J = 16.4$  Hz, 1H) ppm.  $^{13}\text{C}$  NMR (100 MHz,  $\text{CDCl}_3$ ):  $\delta = 21.18, 21.20, 51.8, 123.0, 129.3, 131.1, 137.0, 138.5, 143.6, 167.6$  ppm.

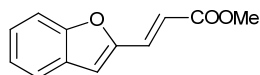

**(E)-Methyl 3-(benzofuran-2-yl)acrylate (3l)<sup>10</sup>**

$\text{Pd}(\text{OAc})_2$  (6.7 mg, 0.03 mmol),  $(\text{NH}_4)_2\text{S}_2\text{O}_8$  (137.0 mg, 0.6 mmol), TFA (111.4  $\mu\text{L}$ , 1.5 mmol), methyl acrylate (54.0  $\mu\text{L}$ , 0.6 mmol), 2,3-benzofuran (33.1  $\mu\text{L}$ , 0.3 mmol) and  $\text{CH}_2\text{Cl}_2$  (2.0 mL) at room temperature for 48 h. Purification via column chromatography on silica gel (petroleum ether/ethyl acetate = 20/1, v/v) afforded **3l** as a pale yellow solid (40.5 mg, 67% yield).  $^1\text{H}$  NMR (400 MHz,  $\text{CDCl}_3$ ):  $\delta = 3.82$  (s, 3H), 6.58 (d,  $J = 15.6$  Hz, 1H), 6.94 (s, 1H), 7.24 (t,  $J = 7.6$  Hz, 1H), 7.36 (t,  $J = 7.6$  Hz, 1H), 7.48 (d,  $J = 8.4$  Hz, 1H), 7.56 (d,  $J = 15.6$  Hz, 1H), 7.59 (d,  $J = 7.6$  Hz, 1H) ppm;  $^{13}\text{C}$  NMR (100 MHz,  $\text{CDCl}_3$ ):  $\delta = 52.0, 111.3, 111.6, 118.7, 121.9, 123.5, 126.6, 128.5, 131.6, 152.5, 155.7, 167.3$  ppm.

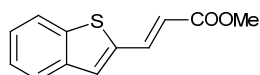

**(E)-Methyl 3-(benzo[b]thiophen-2-yl)acrylate (3m)<sup>10</sup>**

$\text{Pd}(\text{OAc})_2$  (6.7 mg, 0.03 mmol),  $(\text{NH}_4)_2\text{S}_2\text{O}_8$  (137.0 mg, 0.6 mmol), TFA (111.4  $\mu\text{L}$ , 1.5 mmol), methyl acrylate (54.0  $\mu\text{L}$ , 0.6 mmol), benzo[b]thiophene (40.3 mg, 0.3 mmol) and  $\text{CH}_2\text{Cl}_2$  (2.0 mL) at room temperature for 48 h. Purification via column chromatography on silica gel (petroleum ether/ethyl acetate = 20/1, v/v) afforded **3m** as a white solid (41.7 mg, 64% yield).  $^1\text{H}$  NMR (400 MHz,  $\text{CDCl}_3$ ):  $\delta = 3.82$  (s, 3H), 6.30 (d,  $J = 15.6$  Hz, 1H), 7.33-7.39 (m, 2H), 7.46 (s, 1H), 7.75-7.80 (m, 2H), 7.88 (d,  $J = 15.6$  Hz, 1H) ppm.  $^{13}\text{C}$  NMR (100 MHz,  $\text{CDCl}_3$ ):  $\delta = 52.0, 119.2, 122.6, 124.6, 125.0, 126.4, 128.8, 138.0, 139.6, 139.7, 140.4, 167.1$  ppm.

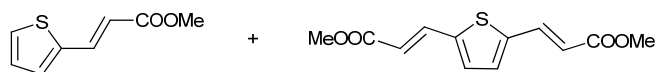

**(E)-Methyl 3-(thiophen-2-yl)acrylate (3n-1)**<sup>11</sup>

Pd(OAc)<sub>2</sub> (6.7 mg, 0.03 mmol), (NH<sub>4</sub>)<sub>2</sub>S<sub>2</sub>O<sub>8</sub> (137.0 mg, 0.6 mmol), TFA (111.4 μL, 1.5 mmol), methyl acrylate (54.0 μL, 0.6 mmol), thiophene (23.8 μL, 0.3 mmol) and CH<sub>2</sub>Cl<sub>2</sub> (2.0 mL) at room temperature for 48 h. Purification via column chromatography on silica gel (petroleum ether/ethyl acetate = 20/1, v/v) afforded **3n-1** (13.4 mg, 27% yield) as a yellow solid. <sup>1</sup>H NMR (400 MHz, CDCl<sub>3</sub>): δ = 3.79 (s, 3H), 6.24 (d, *J* = 16.0 Hz, 1H), 7.05 (dd, *J* = 5.2 Hz, 3.6 Hz, 1H), 7.25 (d, *J* = 4.8 Hz, 1H), 7.37 (d, *J* = 5.2 Hz, 1H), 7.79 (d, *J* = 15.6 Hz, 1H) ppm. <sup>13</sup>C NMR (100 MHz, CDCl<sub>3</sub>): δ = 51.8, 116.7, 128.2, 128.6, 131.1, 137.4, 139.7, 167.4 ppm. Product **3n-2** was also obtained as a yellow solid (45.4 mg, 60% yield).

**(2E,2'E)-Dimethyl 3,3'-(thiophene-2,5-diyl)diacrylate (3n-2)**<sup>11</sup>

<sup>1</sup>H NMR (400 MHz, CDCl<sub>3</sub>): δ = 3.80 (s, 6H), 6.26 (d, *J* = 16.0 Hz, 2H), 7.17 (s, 2H), 7.71 (d, *J* = 16.0 Hz, 2H) ppm. <sup>13</sup>C NMR (100 MHz, CDCl<sub>3</sub>): δ = 52.0, 118.5, 131.8, 136.7, 141.9, 167.0 ppm.

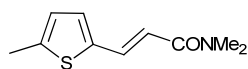

**(E)-N,N-Dimethyl-3-(5-methylthiophen-2-yl)acrylamide (3o)**<sup>12</sup>

Pd(OAc)<sub>2</sub> (6.7 mg, 0.03 mmol), (NH<sub>4</sub>)<sub>2</sub>S<sub>2</sub>O<sub>8</sub> (137.0 mg, 0.6 mmol), TFA (111.4 μL, 1.5 mmol), *N,N*-dimethylacrylamide (61.8 μL, 0.6 mmol), 2-methylthiophene (26.7 μL, 0.3 mmol) and CH<sub>2</sub>Cl<sub>2</sub> (2.0 mL) at room temperature for 48 h. Purification via column chromatography on silica gel (petroleum ether/ethyl acetate = 2/1, v/v) afforded **3o** as a yellow solid (31.7 mg, 54% yield). M.p.: 62-64 °C. <sup>1</sup>H NMR (400 MHz, CDCl<sub>3</sub>): δ = 2.48 (s, 3H), 3.05 (s, 3H), 3.13 (s, 3H), 6.54 (d, *J* = 14.8 Hz, 1H), 6.67-6.68 (m, 1H), 7.00 (d, *J* = 3.6 Hz, 1H), 7.70 (d, *J* = 15.2 Hz, 1H) ppm. <sup>13</sup>C NMR

(100 MHz, CDCl<sub>3</sub>):  $\delta$  = 15.9, 36.1, 37.5, 114.8, 126.5, 131.0, 135.8, 138.6, 142.6, 166.8 ppm. HRMS (ESI<sup>+</sup>): calcd for C<sub>10</sub>H<sub>14</sub>NOS [M+H]<sup>+</sup> 196.0796, found 196.0794.

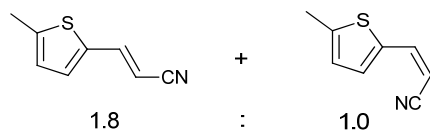

### 3-(5-Methylthiophen-2-yl)acrylonitrile (**3p**)<sup>13</sup>

Pd(OAc)<sub>2</sub> (6.7 mg, 0.03 mmol), selectfluor (212.6 mg, 0.6 mmol), TFA (111.4  $\mu$ L, 1.5 mmol), acrylonitrile (98.7  $\mu$ L, 1.5 mmol), 2-methylthiophene (26.7  $\mu$ L, 0.3 mmol) and CH<sub>2</sub>Cl<sub>2</sub> (2.0 mL) at room temperature for 48 h. Purification via column chromatography on silica gel (petroleum ether/ethyl acetate = 20/1, v/v) afforded **3p** as yellow liquid (a mixture of (*E*)- and (*Z*)-isomers, 23.4 mg, 59% yield). The ratio of (*E*)-**3p**/*Z*-**3p** was 1.8:1.0 as determined by <sup>1</sup>H NMR. <sup>1</sup>H NMR (400 MHz, CDCl<sub>3</sub>, a mixture of two isomers):  $\delta$  = 2.50 (s, CH<sub>3</sub>, major isomer), 2.54 (s, CH<sub>3</sub>, minor isomer), 5.14 (d, *J* = 12.0 Hz, =CH, minor isomer), 5.48 (d, *J* = 16.4 Hz, =CH, major isomer), 6.72-6.73 (m, major isomer), 6.76-6.77 (m, minor isomer), 7.03 (d, *J* = 3.6 Hz, major isomer), 7.13 (d, *J* = 12.0 Hz, minor isomer), 7.30 (d, *J* = 3.6 Hz, minor isomer), 7.37 (d, *J* = 16.4 Hz, major isomer) ppm. <sup>13</sup>C NMR (100 MHz, CDCl<sub>3</sub>):  $\delta$  = 15.9, 16.0, 90.0, 92.8, 118.1, 118.5, 126.1, 126.9, 132.1, 133.4, 136.0, 136.6, 141.3, 143.1, 145.2, 146.2 ppm. HRMS (ESI<sup>+</sup>): calcd for C<sub>8</sub>H<sub>8</sub>NS [M+H]<sup>+</sup> 150.0377, found 150.0377.

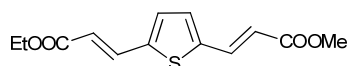

### (*E*)-Ethyl 3-(5-((*E*)-3-methoxy-3-oxoprop-1-en-1-yl)thiophen-2-yl)acrylate (**3q**)<sup>14</sup>

Pd(OAc)<sub>2</sub> (6.7 mg, 0.03 mmol), (NH<sub>4</sub>)<sub>2</sub>S<sub>2</sub>O<sub>8</sub> (137.0 mg, 0.6 mmol), TFA (111.4  $\mu$ L, 1.5 mmol), methyl acrylate (54.0  $\mu$ L, 0.6 mmol), (*E*)-ethyl 3-(thiophen-2-yl)acrylate (54.6 mg, 0.3 mmol) and CH<sub>2</sub>Cl<sub>2</sub> (2.0 mL) at room temperature for 24 h. Purification via column chromatography on silica gel (petroleum ether/ethyl acetate = 20/1, v/v)

afforded **3q** as a yellow solid (40.5 mg, 51% yield). M.p.: 56-58 °C. <sup>1</sup>H NMR (400 MHz, CDCl<sub>3</sub>): δ = 1.33 (t, *J* = 7.2 Hz, 3H), 3.80 (s, 3H), 4.25 (q, *J* = 7.2 Hz, 2H), 6.25 (d, *J* = 15.6 Hz, 2H), 7.17 (s, 2H), 7.69 (d, *J* = 4.0 Hz, 1H), 7.73 (d, *J* = 4.4 Hz, 1H) ppm. <sup>13</sup>C NMR (100 MHz, CDCl<sub>3</sub>): δ = 14.4, 52.0, 60.9, 118.4, 119.0, 131.7, 131.8, 136.4, 136.7, 141.8, 142.0, 166.6, 167.0 ppm. HRMS (ESI<sup>+</sup>): calcd for C<sub>13</sub>H<sub>14</sub>NaO<sub>4</sub>S [M+H]<sup>+</sup> 289.0510, found 289.0514.

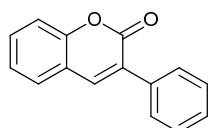

### 3-Phenylcoumarin (**6a**)<sup>15</sup>

Pd(OAc)<sub>2</sub> (6.7 mg, 0.03 mmol), (NH<sub>4</sub>)<sub>2</sub>S<sub>2</sub>O<sub>8</sub> (137.0 mg, 0.6 mmol), TFA (111.4 μL, 1.5 mmol), coumarin (43.8 mg, 0.3 mmol) and benzene (2.0 mL, 22.5 mmol) at room temperature for 48 h. Purification via column chromatography on silica gel (petroleum ether/ethyl acetate = 20/1, v/v) afforded **6a** as a white solid (49.2 mg, 74% yield). <sup>1</sup>H NMR (400 MHz, CDCl<sub>3</sub>): δ = 7.30 (td, *J* = 7.6 Hz, 0.8 Hz, 1H), 7.38 (d, *J* = 8.0 Hz, 1H), 7.41-7.48 (m, 3H), 7.52-7.56 (m, 2H), 7.70-7.72 (m, 2H), 7.82 (s, 1H) ppm. <sup>13</sup>C NMR (100 MHz, CDCl<sub>3</sub>): δ = 116.6, 119.8, 124.6, 128.0, 128.5, 128.6, 128.7, 129.0, 131.5, 134.9, 140.0, 153.7, 160.7 ppm.

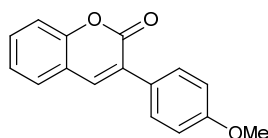

### 3-(4-Methoxyphenyl)-2H-chromen-2-one (**6b**)<sup>15</sup>

Pd(OAc)<sub>2</sub> (6.7 mg, 0.03 mmol), (NH<sub>4</sub>)<sub>2</sub>S<sub>2</sub>O<sub>8</sub> (137.0 mg, 0.6 mmol), TFA (111.4 μL, 1.5 mmol), coumarin (43.8 mg, 0.3 mmol) and anisole (2.4 mL, 22.5 mmol) at room temperature for 24 h. Purification via column chromatography on silica gel (petroleum ether/ethyl acetate = 20/1, v/v) afforded **6b** as a white solid (60.1 mg, 79%

yield).  $^1\text{H}$  NMR (400 MHz,  $\text{CDCl}_3$ ):  $\delta$  = 3.86 (s, 3H), 6.98 (d,  $J$  = 8.8 Hz, 2H), 7.29 (t,  $J$  = 8.0 Hz, 1H), 7.36 (d,  $J$  = 8.4 Hz, 1H), 7.49-7.54 (m, 2H), 7.68 (d,  $J$  = 8.8 Hz, 2H), 7.76 (s, 1H) ppm.  $^{13}\text{C}$  NMR (100 MHz,  $\text{CDCl}_3$ ):  $\delta$  = 55.5, 114.1, 116.5, 120.0, 124.6, 127.2, 127.8, 128.0, 130.0, 131.2, 138.6, 153.5, 160.3, 160.9 ppm.

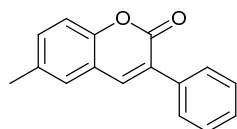

### 6-Methyl-3-phenyl-2H-chromen-2-one (**6c**)<sup>15</sup>

$\text{Pd}(\text{OAc})_2$  (6.7 mg, 0.03 mmol),  $(\text{NH}_4)_2\text{S}_2\text{O}_8$  (137.0 mg, 0.6 mmol), TFA (111.4  $\mu\text{L}$ , 1.5 mmol), 6-methylcoumarin (48.1 mg, 0.3 mmol) and benzene (2.0 mL, 22.5 mmol) at room temperature for 48 h. Purification via column chromatography on silica gel (petroleum ether/ethyl acetate = 20/1, v/v) afforded **6c** as a white solid (52.3 mg, 74% yield).  $^1\text{H}$  NMR (400 MHz,  $\text{CDCl}_3$ ):  $\delta$  = 2.42 (s, 3H), 7.25-7.27 (m, 1H), 7.33 (s, 1H), 7.33 (d,  $J$  = 7.2 Hz, 1H), 7.40-7.47 (m, 3H), 7.70 (d,  $J$  = 6.8 Hz, 2H), 7.76 (s, 1H) ppm.  $^{13}\text{C}$  NMR (100 MHz,  $\text{CDCl}_3$ ):  $\delta$  = 20.9, 116.3, 119.6, 127.8, 128.4, 128.6, 128.7, 128.9, 132.6, 134.3, 135.0, 140.0, 151.8, 160.9 ppm.

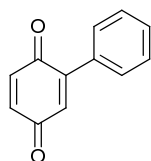

### 2-Phenyl-1,4-benzoquinone (**7a**)<sup>16</sup>

$\text{Pd}(\text{OAc})_2$  (6.7 mg, 0.03 mmol),  $(\text{NH}_4)_2\text{S}_2\text{O}_8$  (137.0 mg, 0.6 mmol), TFA (111.4  $\mu\text{L}$ , 1.5 mmol), 1,4-benzoquinone (32.4 mg, 0.3 mmol) and benzene (2.0 mL, 22.5 mmol) at room temperature for 24 h. Purification via column chromatography on silica gel (petroleum ether/ $\text{CH}_2\text{Cl}_2$  = 1/1, v/v) afforded **7a** as a yellow solid (34.8 mg, 63% yield).  $^1\text{H}$  NMR (400 MHz,  $\text{CDCl}_3$ ):  $\delta$  = 6.82-6.89 (m, 3H), 7.42-7.49 (m, 5H) ppm.  $^{13}\text{C}$  NMR (100 MHz,  $\text{CDCl}_3$ ):  $\delta$  = 128.6, 129.3, 130.2, 132.8, 136.3, 137.1, 146.0,



186.7, 187.7 ppm.

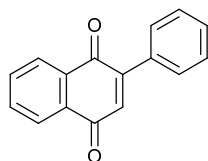

### 2-Phenyl-1,4-naphthoquinone (**7b**)<sup>16</sup>

Pd(OAc)<sub>2</sub> (6.7 mg, 0.03 mmol), (NH<sub>4</sub>)<sub>2</sub>S<sub>2</sub>O<sub>8</sub> (137.0 mg, 0.6 mmol), TFA (111.4 μL, 1.5 mmol), 1,4-naphthoquinone (47.4 mg, 0.3 mmol) and benzene (2.0 mL, 22.5 mmol) at room temperature for 24 h. Purification via column chromatography on silica gel (petroleum ether/CH<sub>2</sub>Cl<sub>2</sub> = 2/1, v/v) afforded **7b** as a yellow solid (66.1 mg, 94% yield). <sup>1</sup>H NMR (400 MHz, CDCl<sub>3</sub>): δ = 7.09 (s, 1H), 7.48-7.49 (m, 3H), 7.57-7.58 (m, 2H), 7.79 (t, *J* = 4.4 Hz, 2H), 8.11-8.14 (m, 1H), 8.18-8.20 (m, 1H) ppm. <sup>13</sup>C NMR (100 MHz, CDCl<sub>3</sub>): δ = 126.1, 127.2, 128.6, 129.6, 130.2, 132.2, 132.6, 133.5, 133.95, 134.02, 135.3, 148.2, 184.5, 185.3 ppm.

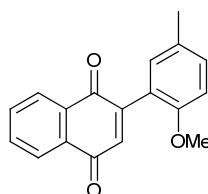

### 2-(2-Methoxy-5-methylphenyl)naphthalene-1,4-dione (**7c**)<sup>16</sup>

Pd(OAc)<sub>2</sub> (6.7 mg, 0.03 mmol), (NH<sub>4</sub>)<sub>2</sub>S<sub>2</sub>O<sub>8</sub> (137.0 mg, 0.6 mmol), TFA (111.4 μL, 1.5 mmol), 1,4-naphthoquinone (47.4 mg, 0.3 mmol) and 4-methylanisole (2.8 mL, 22.5 mmol) at room temperature for 24 h. Purification via column chromatography on silica gel (petroleum ether/CH<sub>2</sub>Cl<sub>2</sub> = 2/1-1/1, v/v) afforded **7c** as a yellow solid (78.2 mg, 87% yield). <sup>1</sup>H NMR (400 MHz, CDCl<sub>3</sub>): δ = 2.33 (s, 3H), 3.76 (s, 3H), 6.89 (d, *J* = 8.4 Hz, 1H), 7.01 (s, 1H), 7.05 (d, *J* = 2.0 Hz, 1H), 7.22 (dd, *J* = 8.4 Hz, 2.0 Hz, 1H), 7.73-7.77 (m, 2H), 8.10-8.16 (m, 2H) ppm. <sup>13</sup>C NMR (100 MHz, CDCl<sub>3</sub>): δ = 20.5, 56.0, 111.4, 123.2, 126.1, 127.0, 130.0, 131.1, 131.5, 132.3, 132.7, 133.6, 133.8,

136.7, 148.4, 155.3, 183.7, 185.4 ppm.

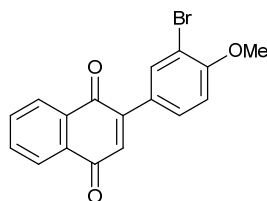

### 2-(3-Bromo-4-methoxyphenyl)naphthalene-1,4-dione (**7d**)

Pd(OAc)<sub>2</sub> (6.7 mg, 0.03 mmol), (NH<sub>4</sub>)<sub>2</sub>S<sub>2</sub>O<sub>8</sub> (137.0 mg, 0.6 mmol), TFA (111.4 μL, 1.5 mmol), 1,4-naphthoquinone (47.4 mg, 0.3 mmol) and 2-bromoanisole (2.8 mL, 22.5 mmol) at room temperature for 24 h. Purification via column chromatography on silica gel (*n*-hexane/ethyl acetate = 20/1, v/v) afforded **7d** as a yellow solid (42.4 mg, 41% yield). M.p.: 202-204 °C. <sup>1</sup>H NMR (400 MHz, CDCl<sub>3</sub>): δ = 3.97 (s, 3H), 7.00 (d, *J* = 8.8 Hz, 1H), 7.05 (s, 1H), 7.57 (dd, *J* = 8.8 Hz, 2.4 Hz, 1H), 7.77-7.79 (m, 2H), 7.85 (d, *J* = 2.4 Hz, 1H), 8.11-8.13 (m, 1H), 8.17-8.19 (m, 1H) ppm. <sup>13</sup>C NMR (100 MHz, CDCl<sub>3</sub>): δ = 56.6, 111.7, 112.0, 126.1, 127.0, 127.2, 130.2, 132.2, 132.5, 134.05, 134.07, 134.5, 146.2, 157.6, 184.5, 185.1 ppm. HRMS (ESI<sup>+</sup>): calcd for C<sub>17</sub>H<sub>11</sub>BrNaO<sub>3</sub> [M+Na]<sup>+</sup> 364.9789, found 364.9788.

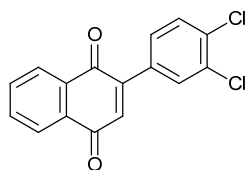

### 2-(3,4-Dichlorophenyl)naphthalene-1,4-dione (**7e**)<sup>16</sup>

Pd(OAc)<sub>2</sub> (6.7 mg, 0.03 mmol), (NH<sub>4</sub>)<sub>2</sub>S<sub>2</sub>O<sub>8</sub> (137.0 mg, 0.6 mmol), TFA (222.8 μL, 3.0 mmol), 1,4-naphthoquinone (47.4 mg, 0.3 mmol) and 1,2-dichlorobenzene (2.5 mL, 22.5 mmol) at room temperature for 48 h. Purification via column chromatography on silica gel (petroleum ether/CH<sub>2</sub>Cl<sub>2</sub> = 1/1, v/v) afforded **7e** as a yellow solid (48.3 mg, 53% yield). <sup>1</sup>H NMR (400 MHz, CDCl<sub>3</sub>): δ = 7.07 (s, 1H),

7.42 (d,  $J = 8.0$  Hz, 1H), 7.56 (d,  $J = 8.4$  Hz, 1H), 7.70 (s, 1H), 7.80 (t,  $J = 4.4$  Hz, 2H), 8.11-8.14 (m, 1H), 8.17-8.19 (m, 1H) ppm.  $^{13}\text{C}$  NMR (100 MHz,  $\text{CDCl}_3$ ):  $\delta = 126.3, 127.3, 128.7, 130.7, 131.4, 132.1, 132.3, 133.0, 133.3, 134.3, 134.7, 135.8, 145.9, 183.9, 184.8$  ppm.

## X. References

- (1) A. Kubota, M. H. Emmert and M. S. Sanford, *Org. Lett.*, 2012, **14**, 1760.
- (2) J. Tummatorn, P. A. Albiniaak and G. B. Dudley, *J. Org. Chem.*, 2007, **72**, 8962.
- (3) K. Itoh, A. Tsuruta, J.-i. Ito, Y. Yamamoto and H. Nishiyama, *J. Org. Chem.*, 2012, **77**, 10914.
- (4) S. Thielges, P. Bisseret and J. Eustache, *Org. Lett.*, 2005, **7**, 681.
- (5) B. R. Ambler and R. A. Altman, *Org. Lett.*, 2013, **15**, 5578.
- (6) (a) Z. Zhang and Z. Wang, *J. Org. Chem.*, 2006, **71**, 7485; (b) G. Xie, P. Chellan, J. Mao, K. Chibale and G. S. Smith, *Adv. Synth. Catal.*, 2010, **352**, 1641.
- (7) H. K. Neudeck, *Monatsh. Chem.*, 1996, **127**, 185.
- (8) A. El-Batta, C. Jiang, W. Zhao, R. Anness, A. L. Cooksy and M. Bergdahl, *J. Org. Chem.*, 2007, **72**, 5244.
- (9) T. Matsuda, S. Shiose and Y. Suda, *Adv. Synth. Catal.*, 2011, **353**, 1923.
- (10) B. Zhang, Q. Yang, X. He, J. Chao, J. Chang and Q. Wu, *Chem. J. Chinese. U.*, 2012, **33**, 1471.
- (11) Y. Fujiwara, O. Maruyama, M. Yoshidomi and H. Taniguchi, *J. Org. Chem.*, 1981, **46**, 851.
- (12) M. Oberholzer and C. M. Frech, *Green Chem.*, 2013, **15**, 1678.
- (13) C. Qin and N. Jiao, *J. Am. Chem. Soc.*, 2010, **132**, 15893.
- (14) T. Thiemann, M. Watanabe and J. Iniesta, *Engineering Sciences Reports*, 2007, **28**, 379.
- (15) F. Jafarpour, H. Hazrati, N. Mohasselyazdi, M. Khoobi and A. Shafiee, *Chem. Commun.*, 2013, **49**, 10935.
- (16) S. Zhang, F. Song, D. Zhao and J. You, *Chem. Commun.*, 2013, **49**, 4558.

# XI. Copies of $^1\text{H}$ , $^{13}\text{C}$ NMR and $^1\text{H}$ - $^1\text{H}$ NOESY spectra

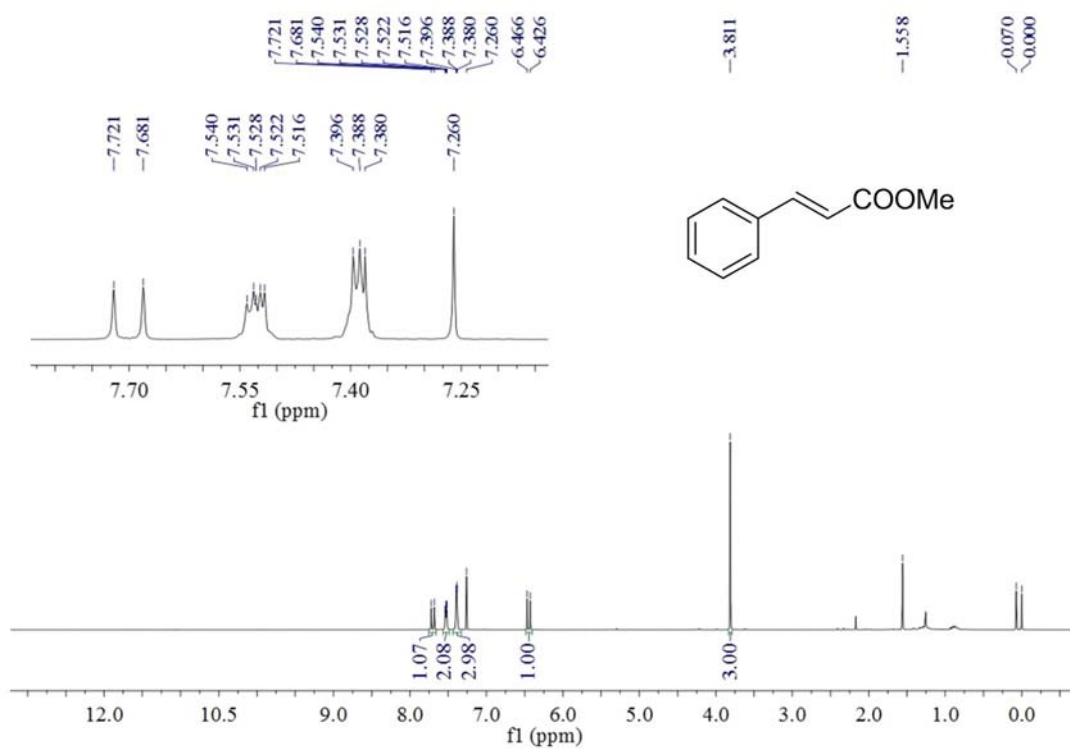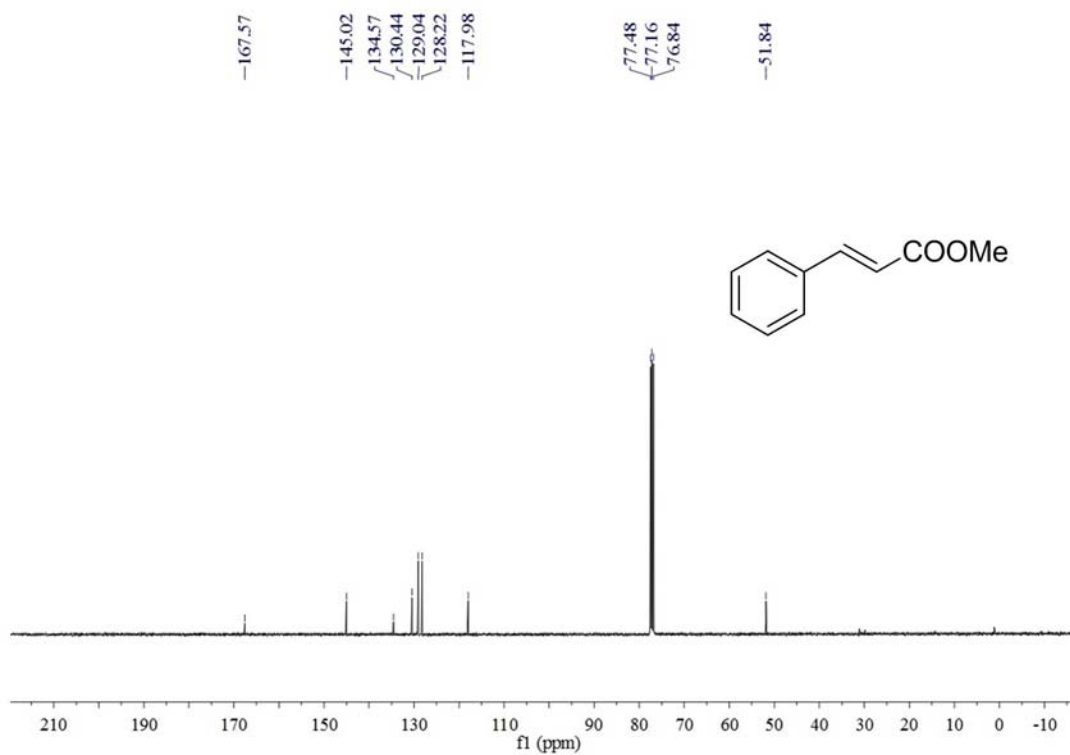

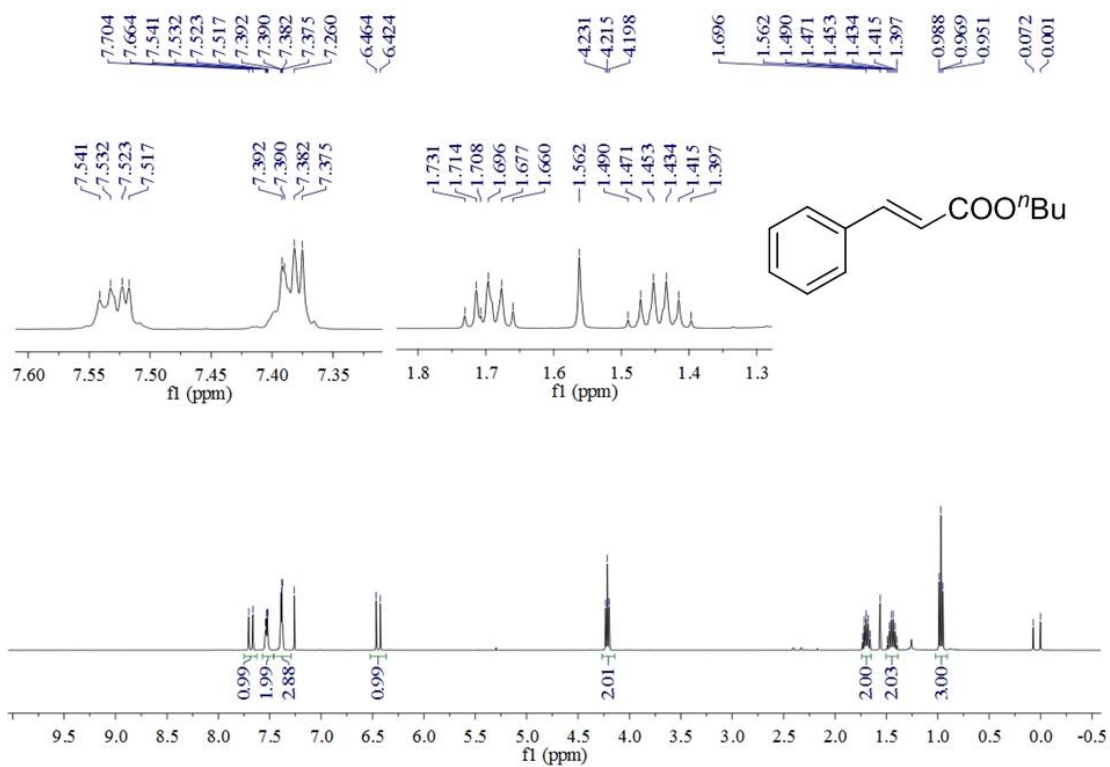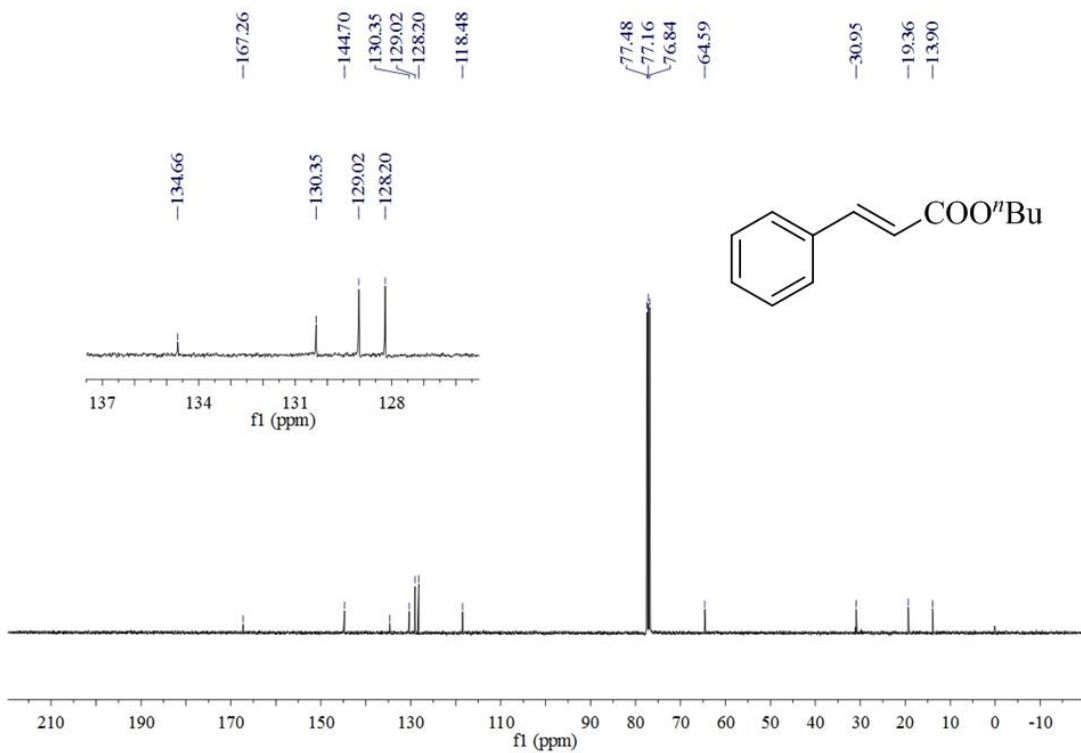

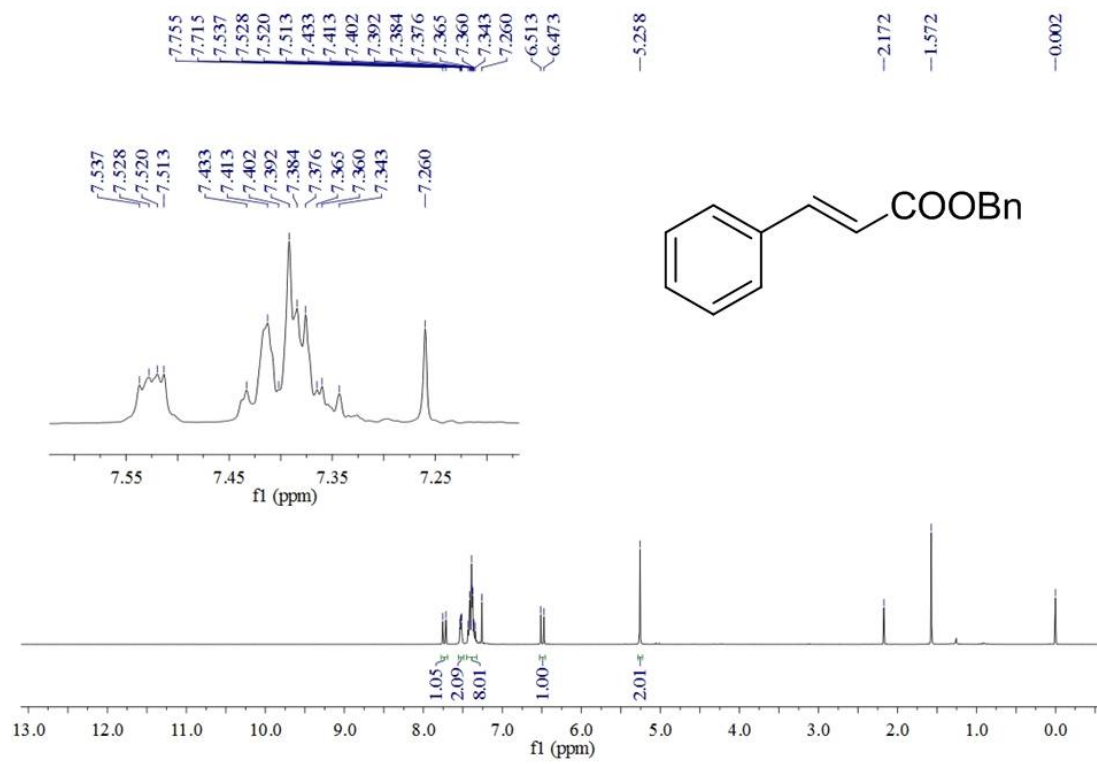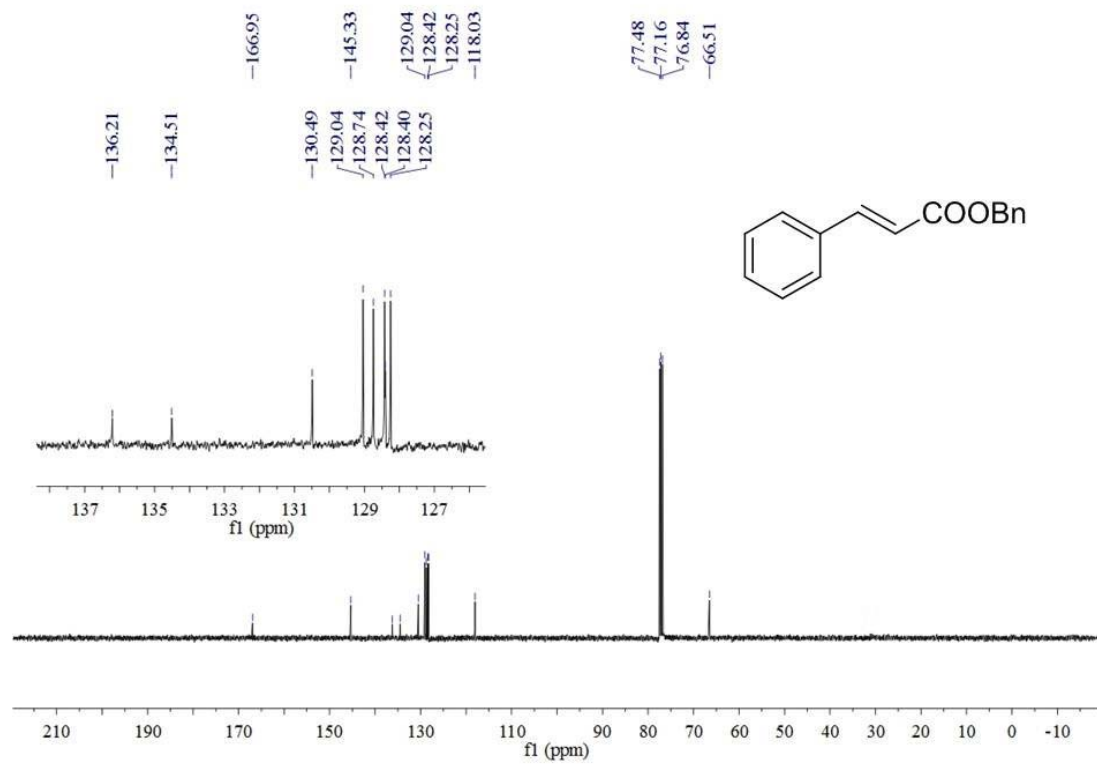



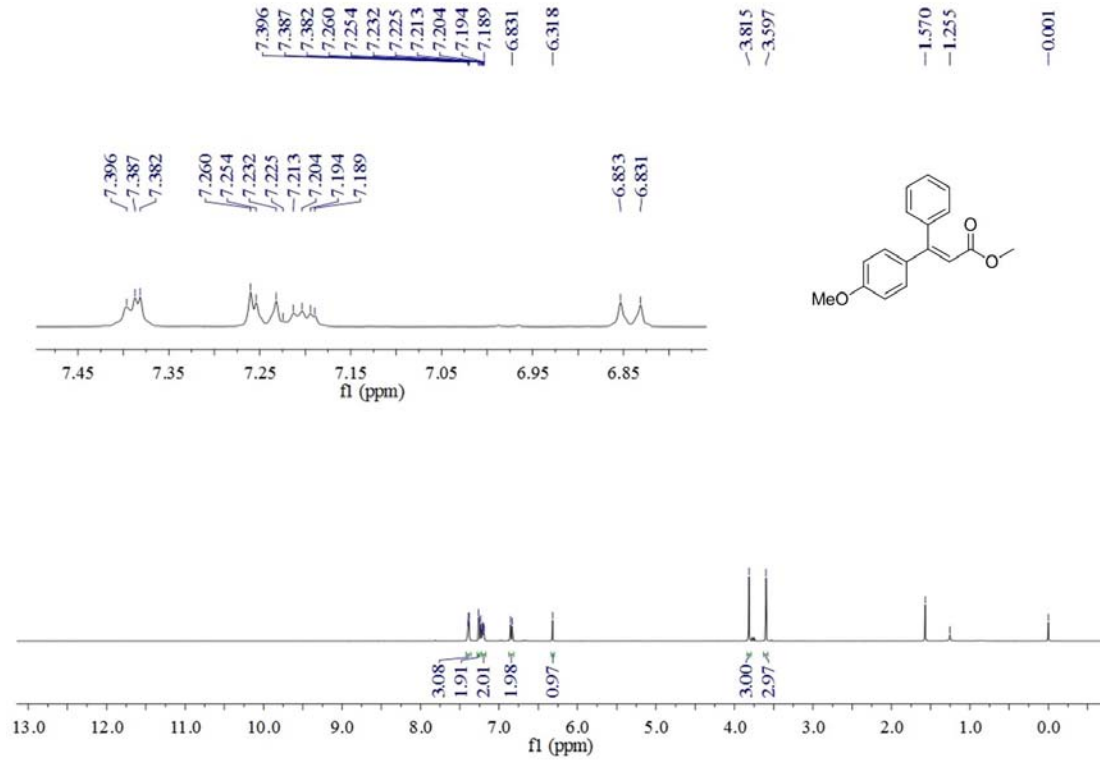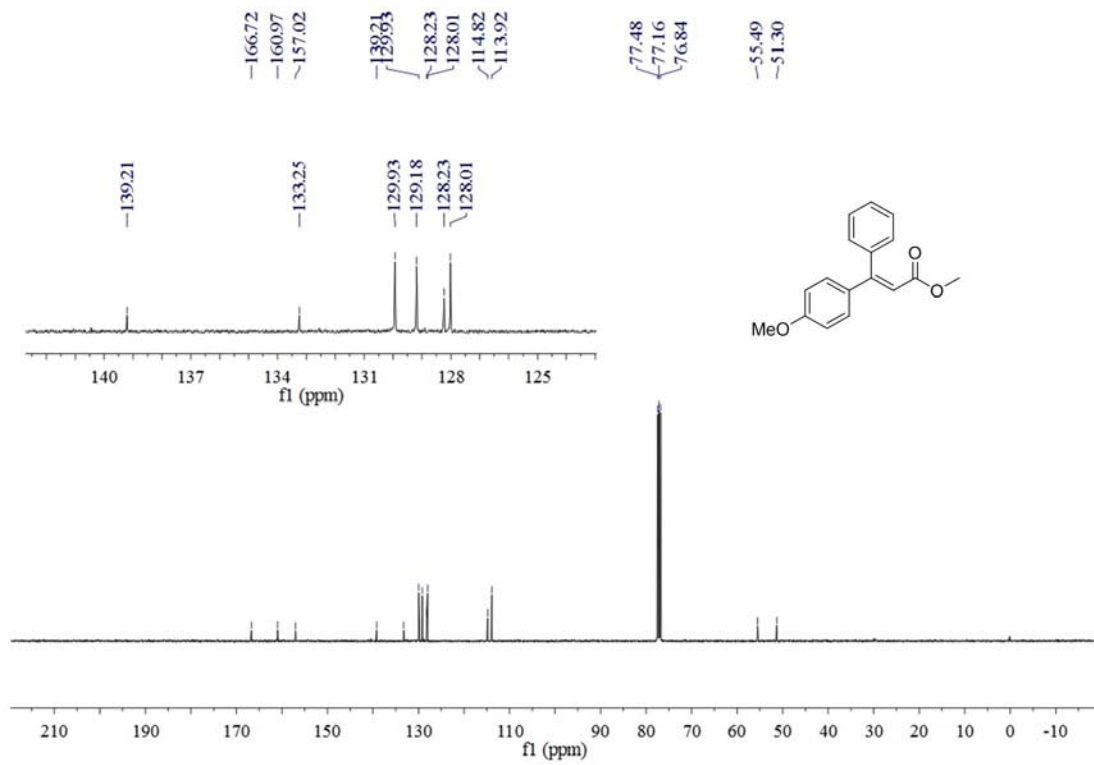



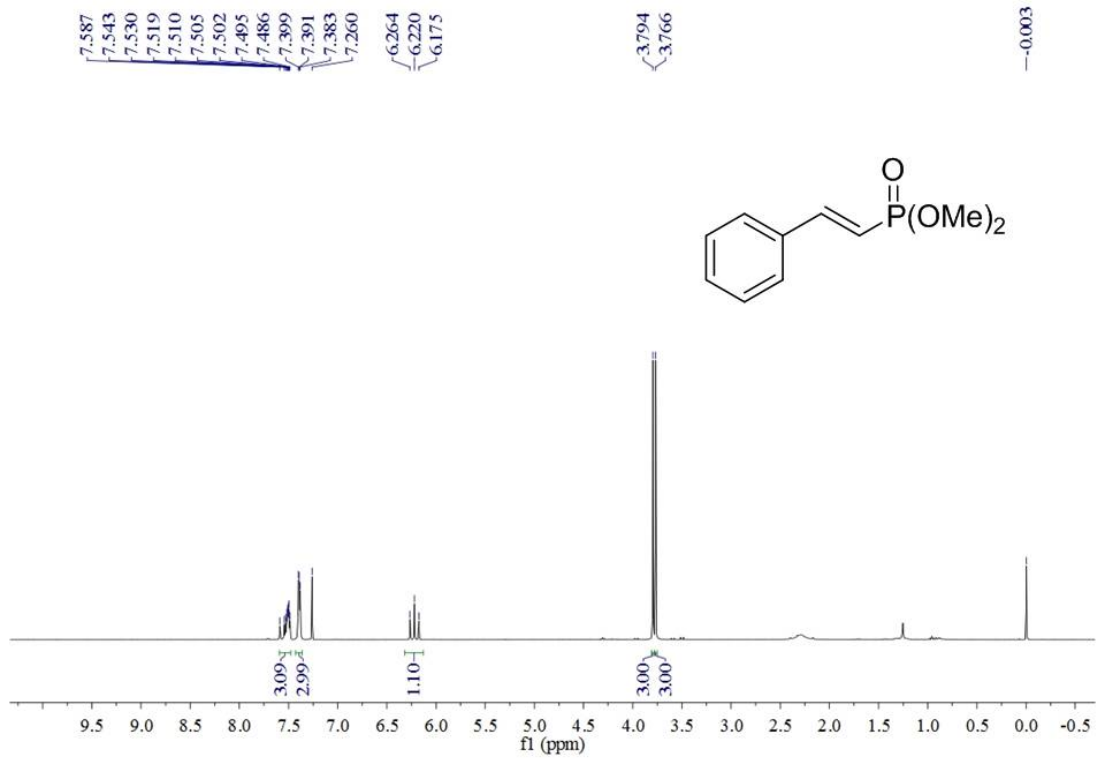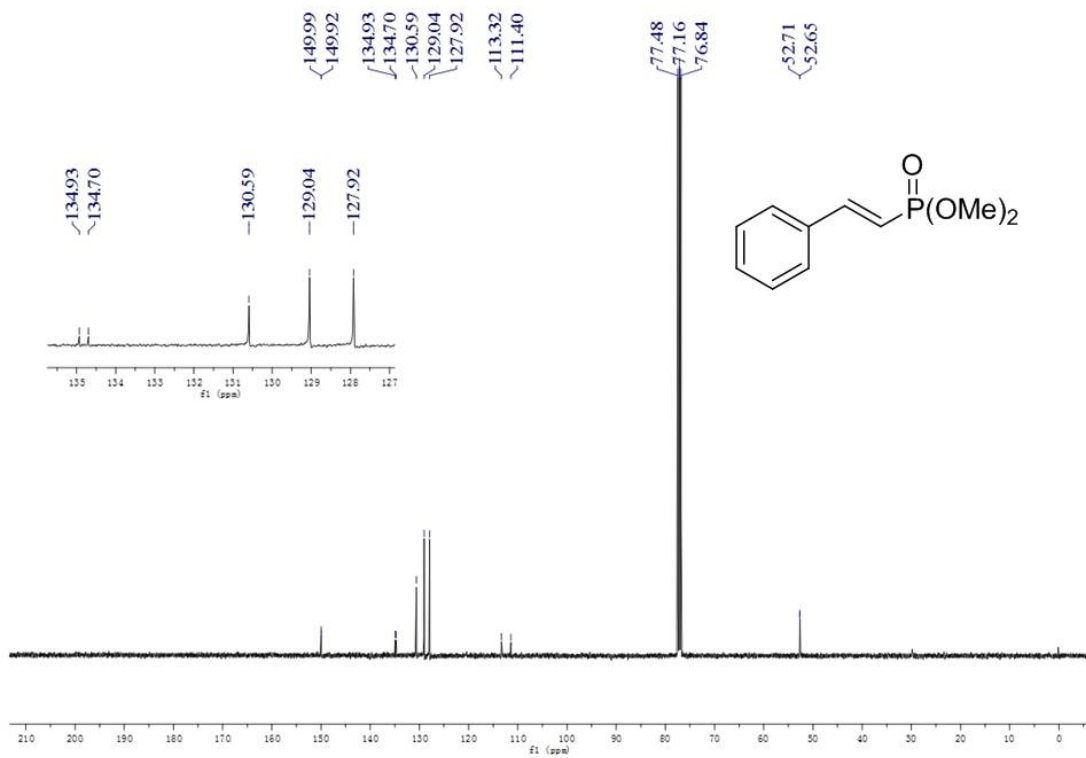

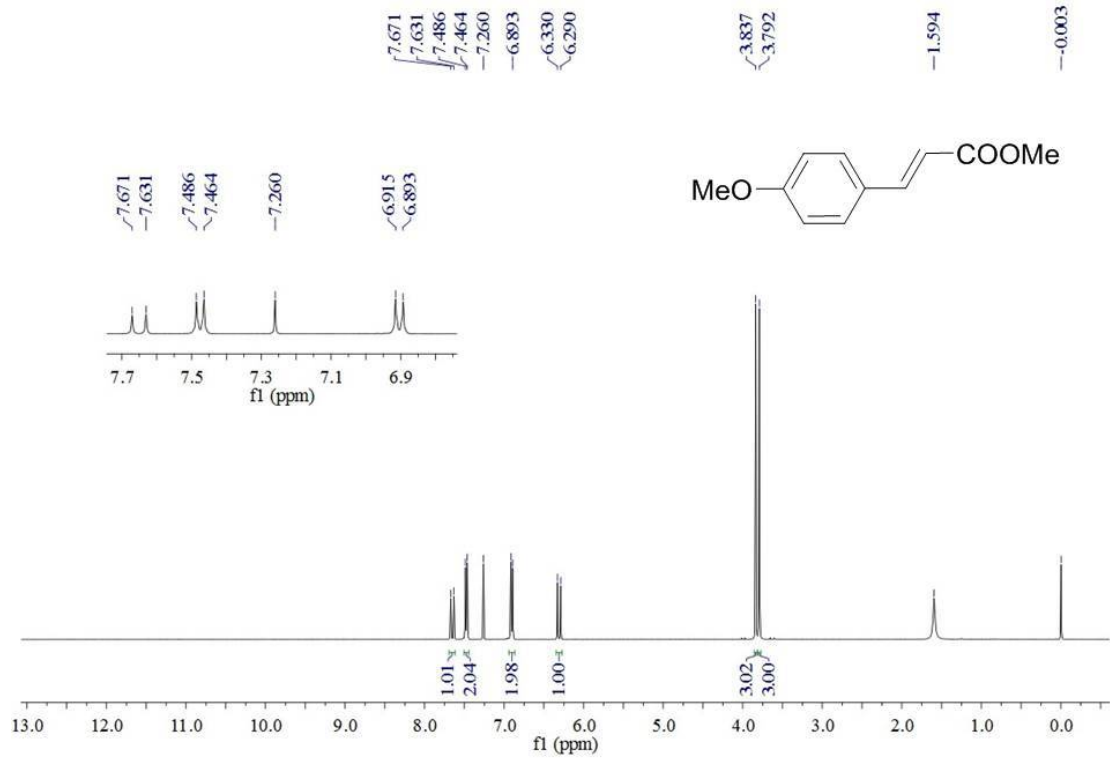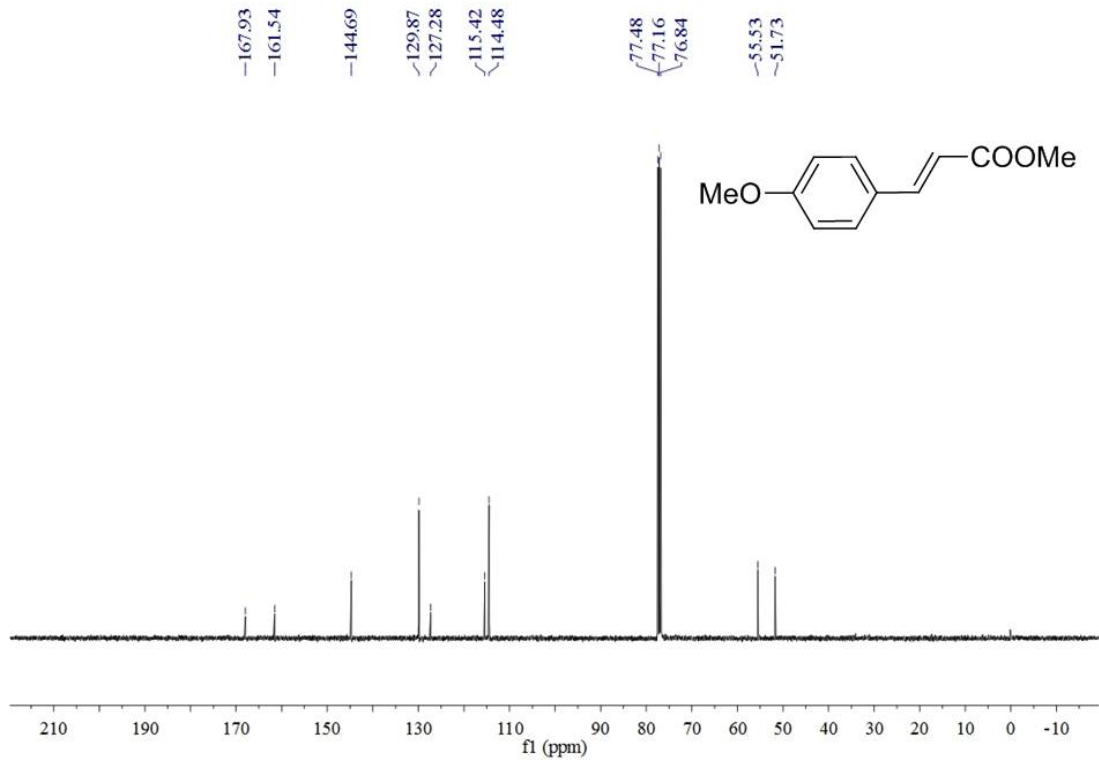

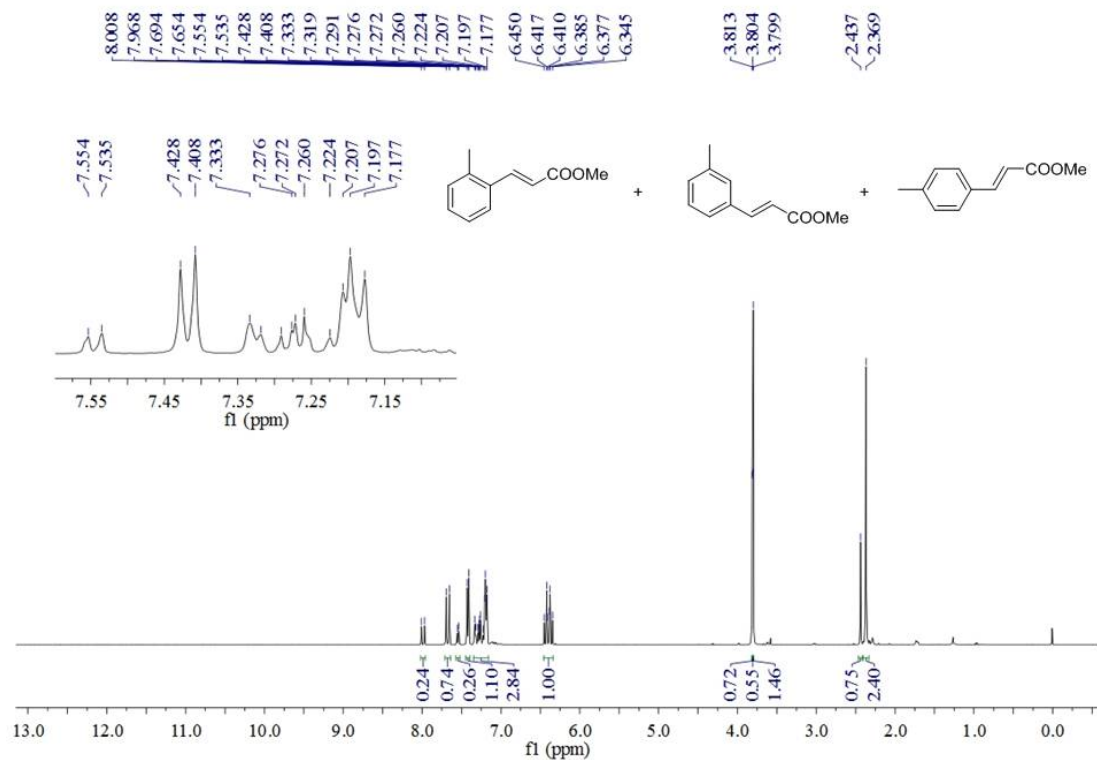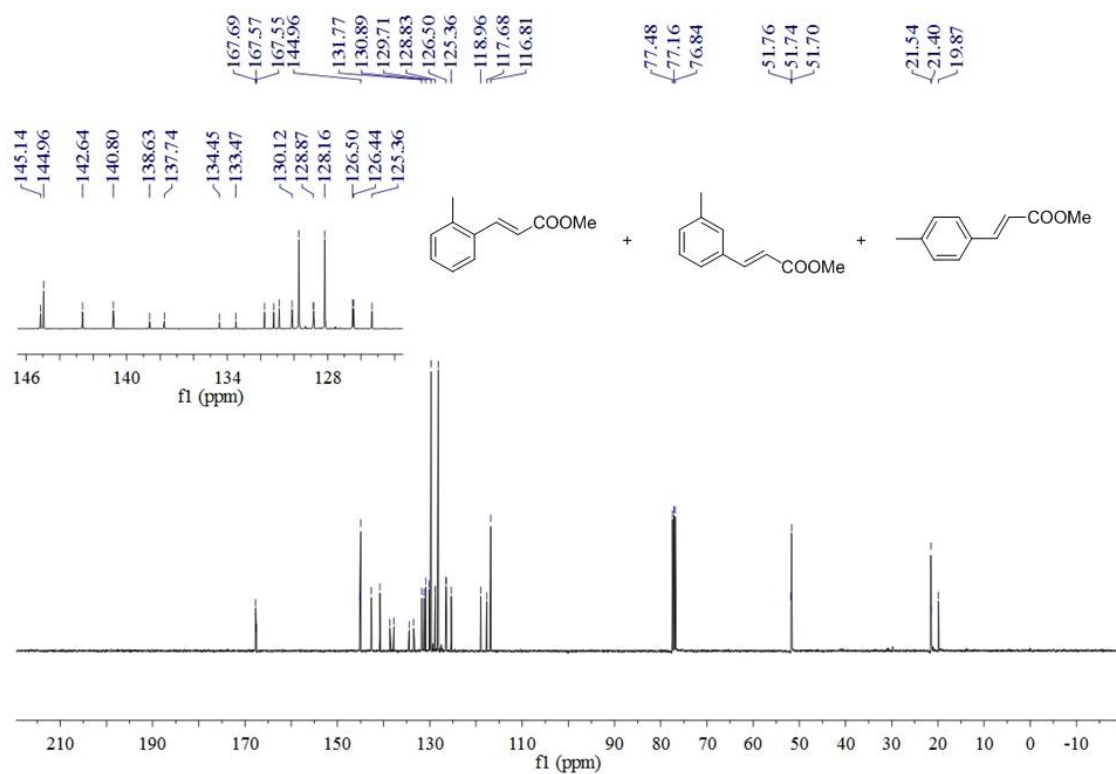

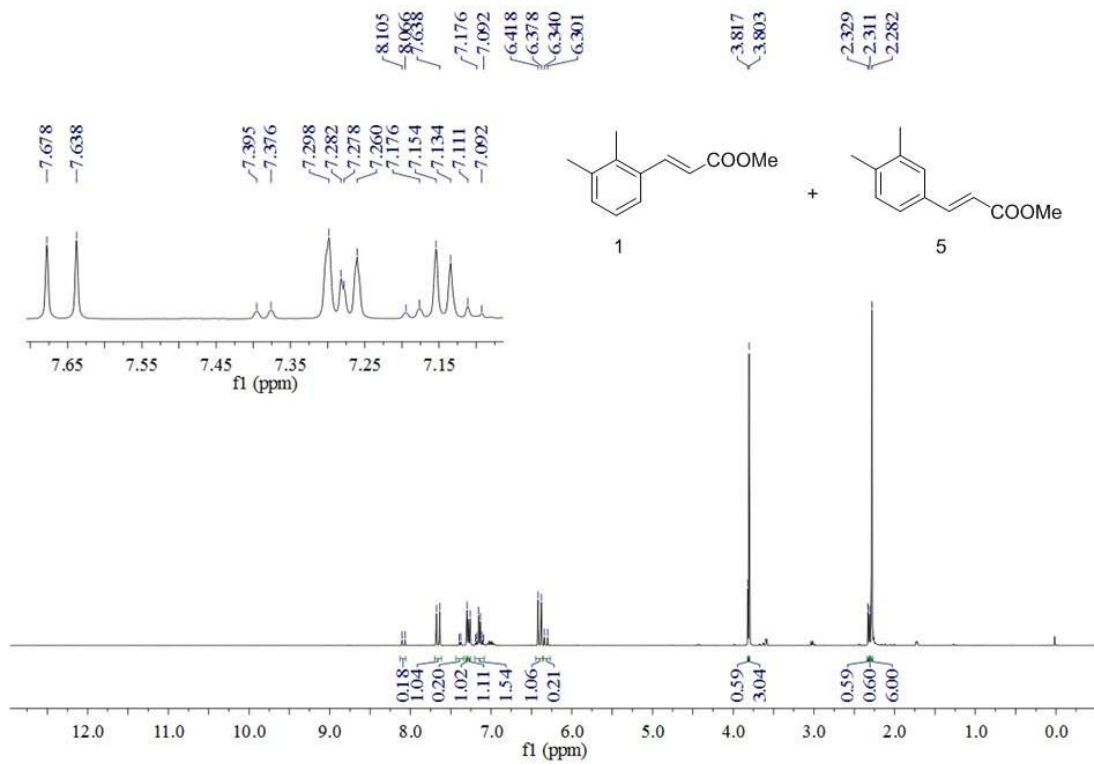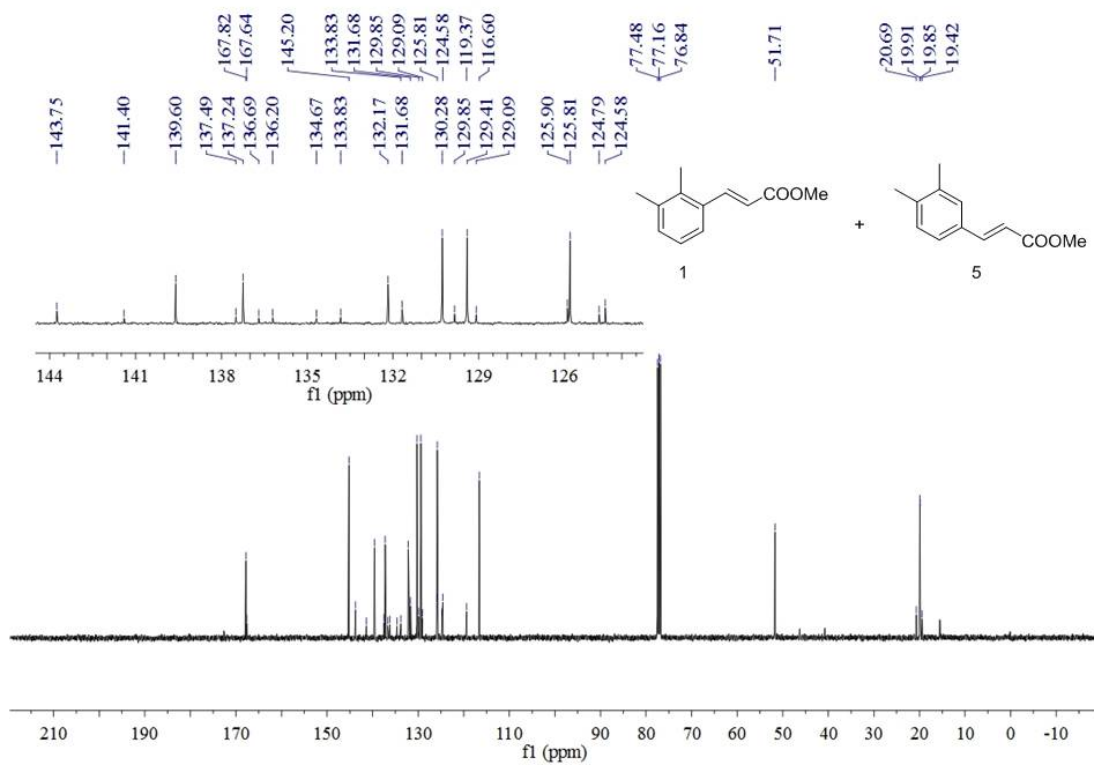

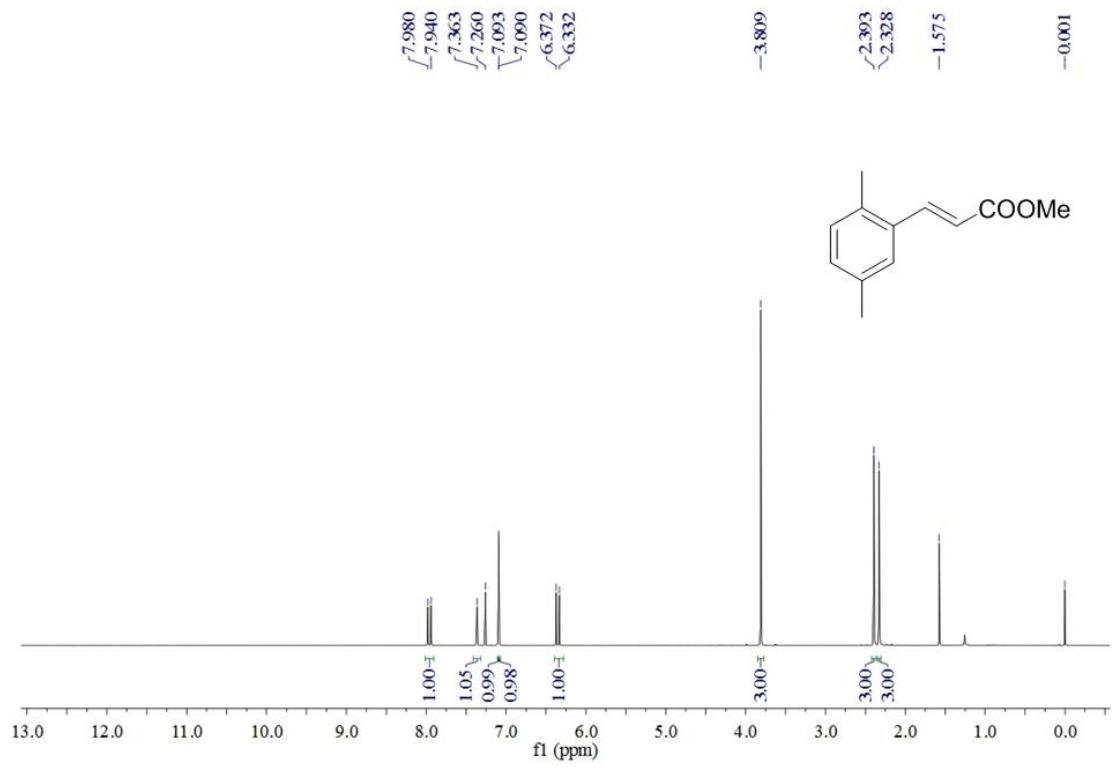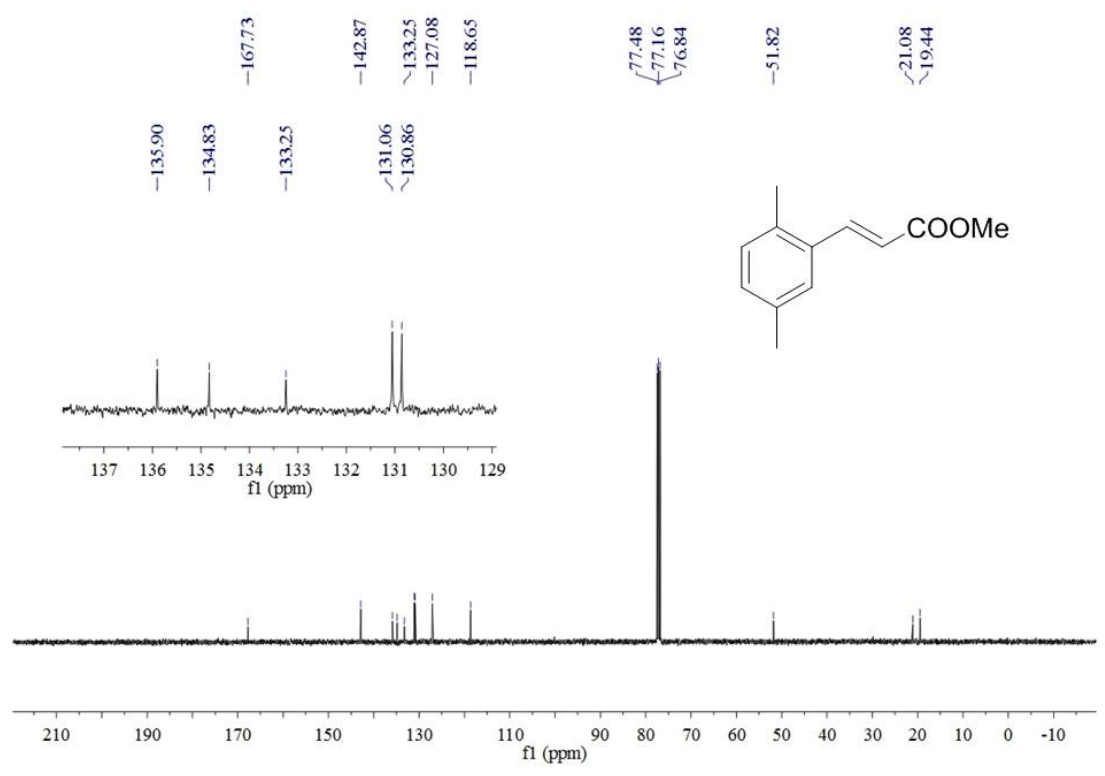

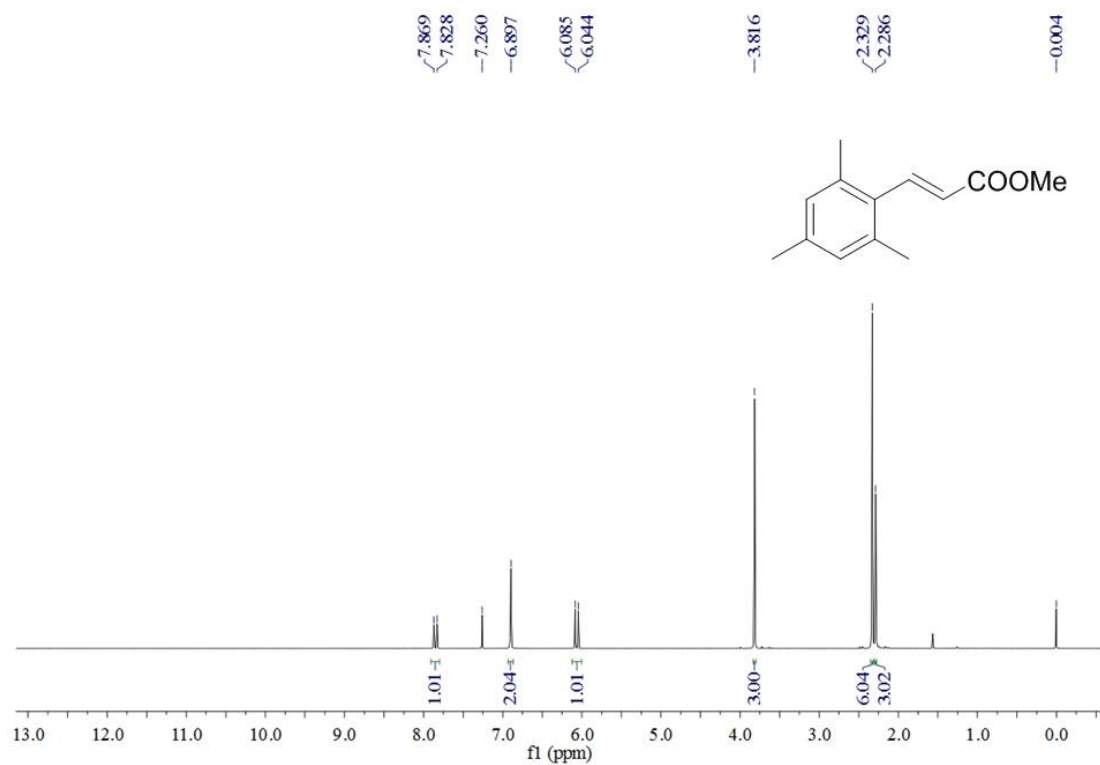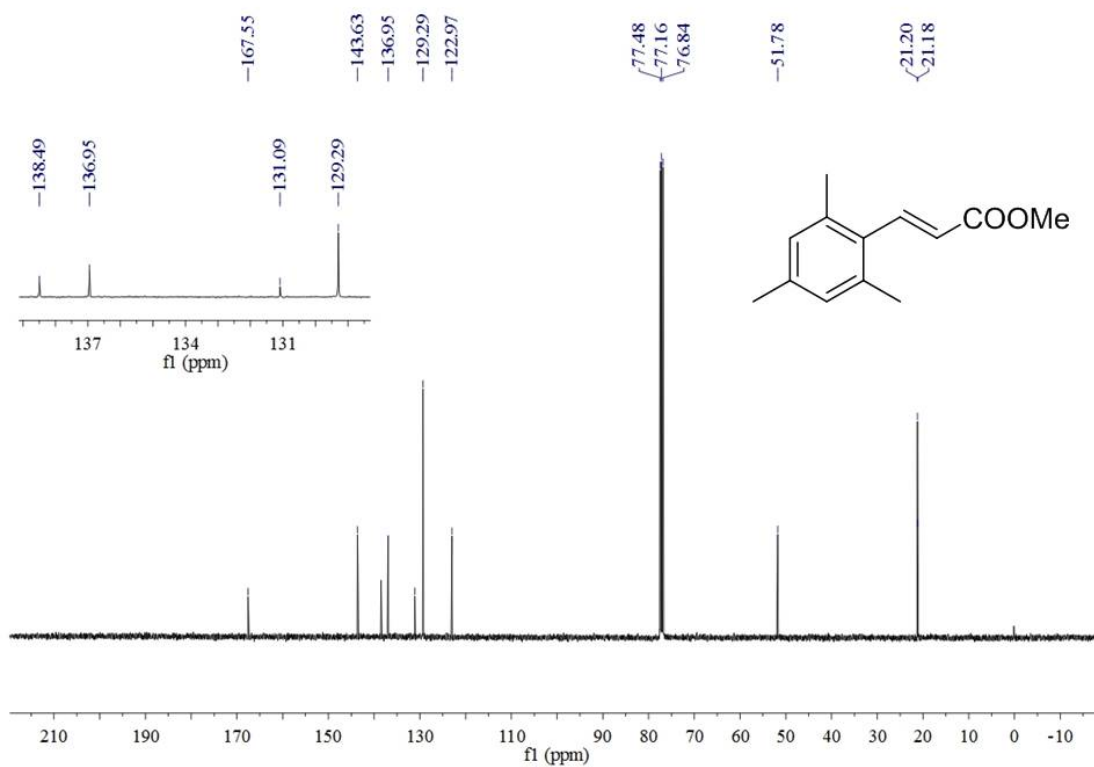

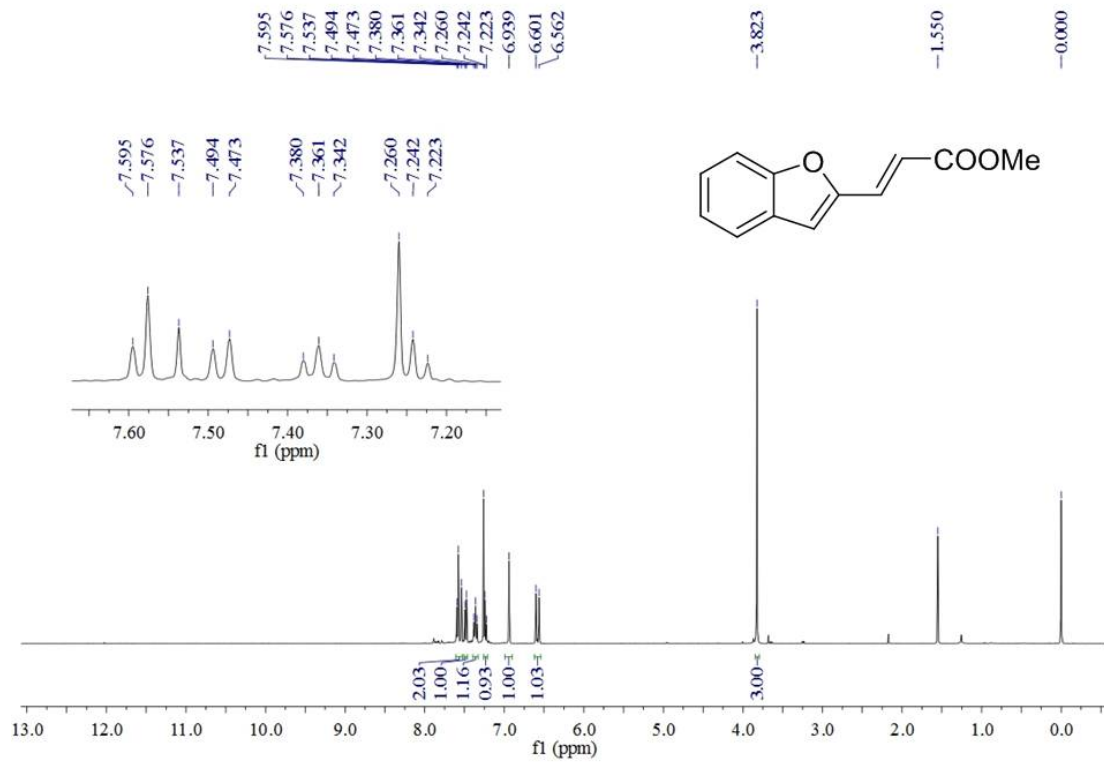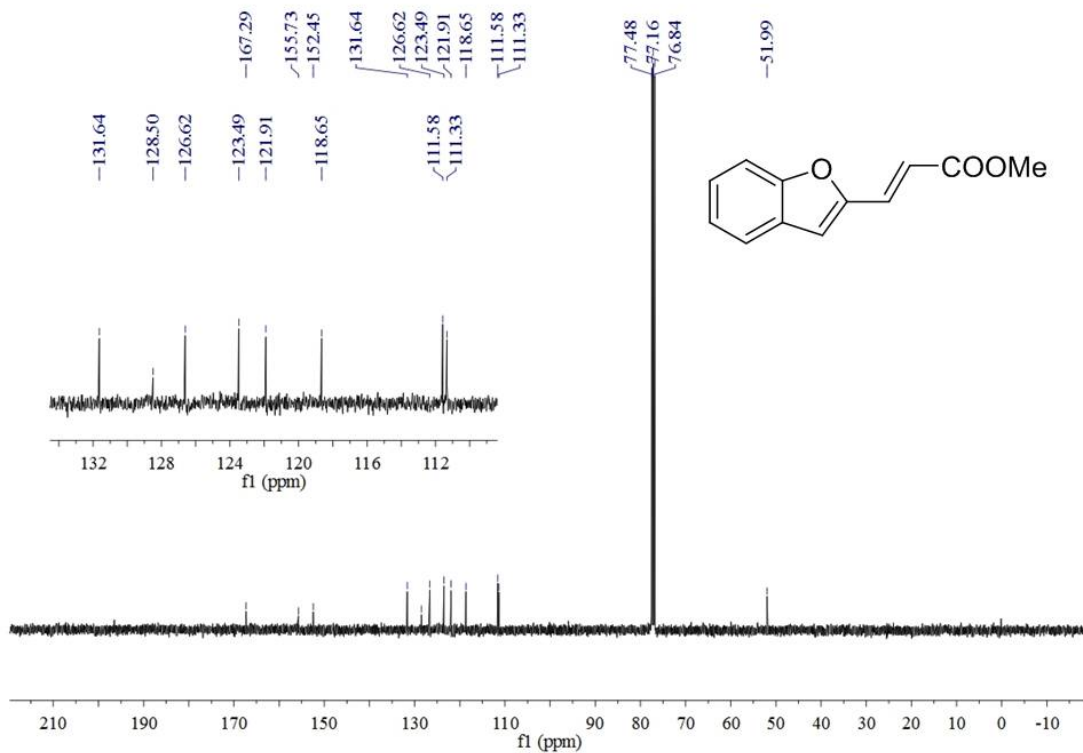

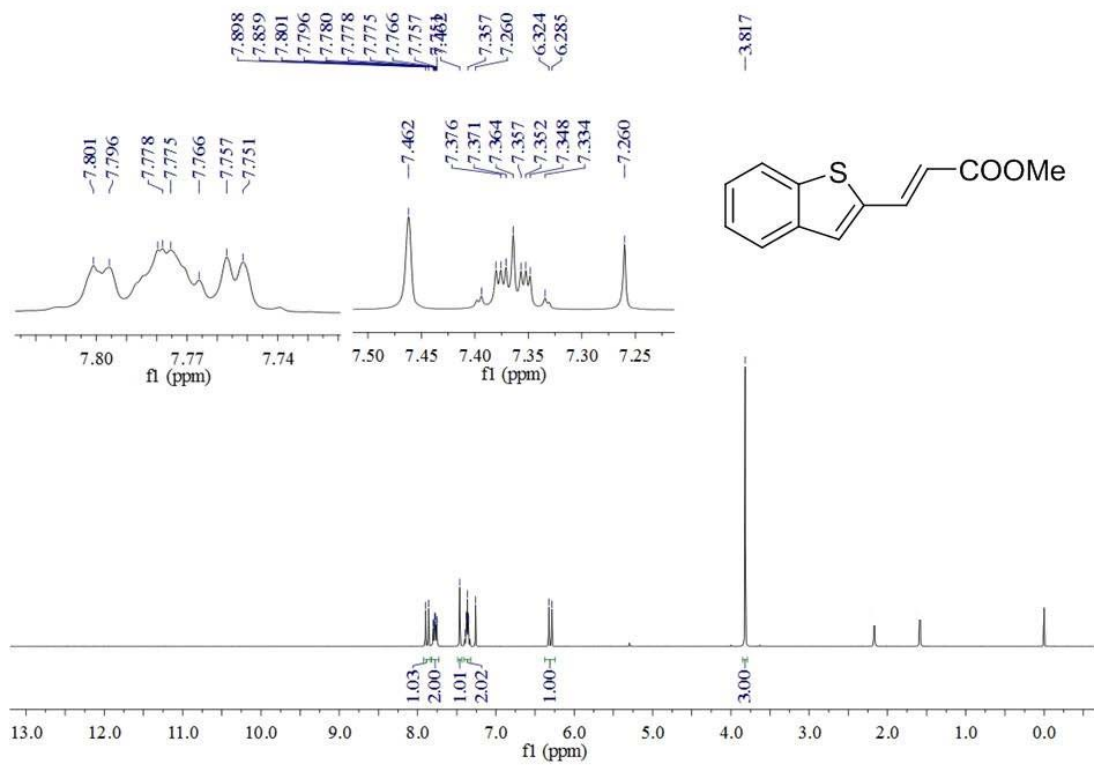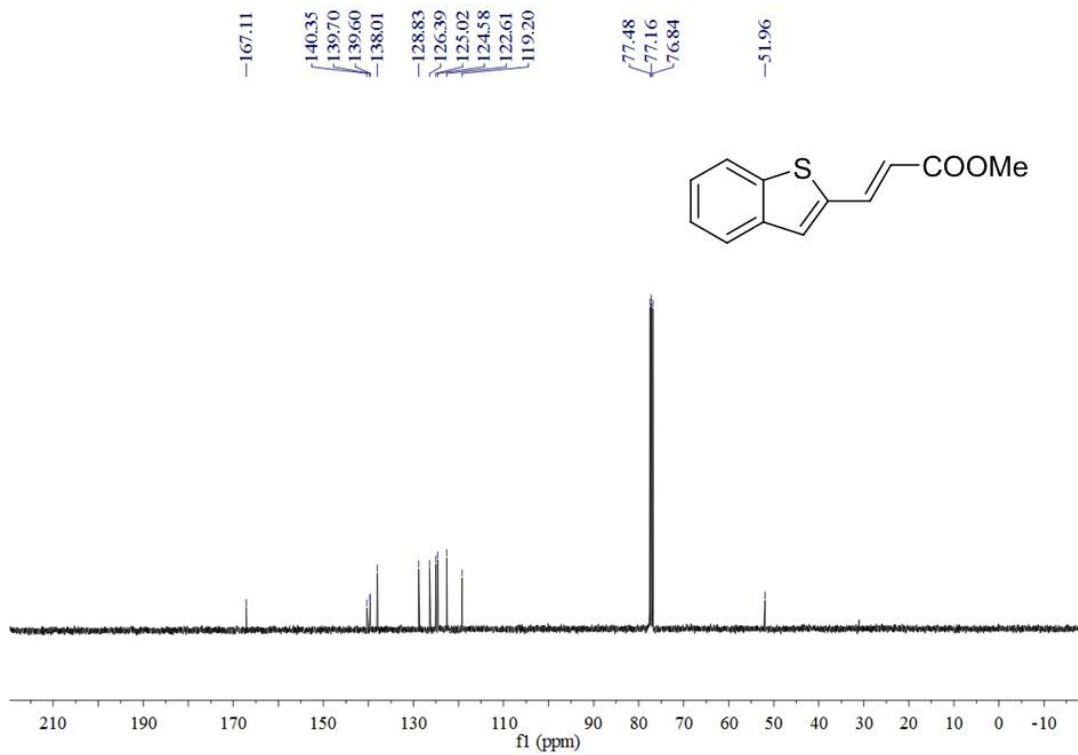



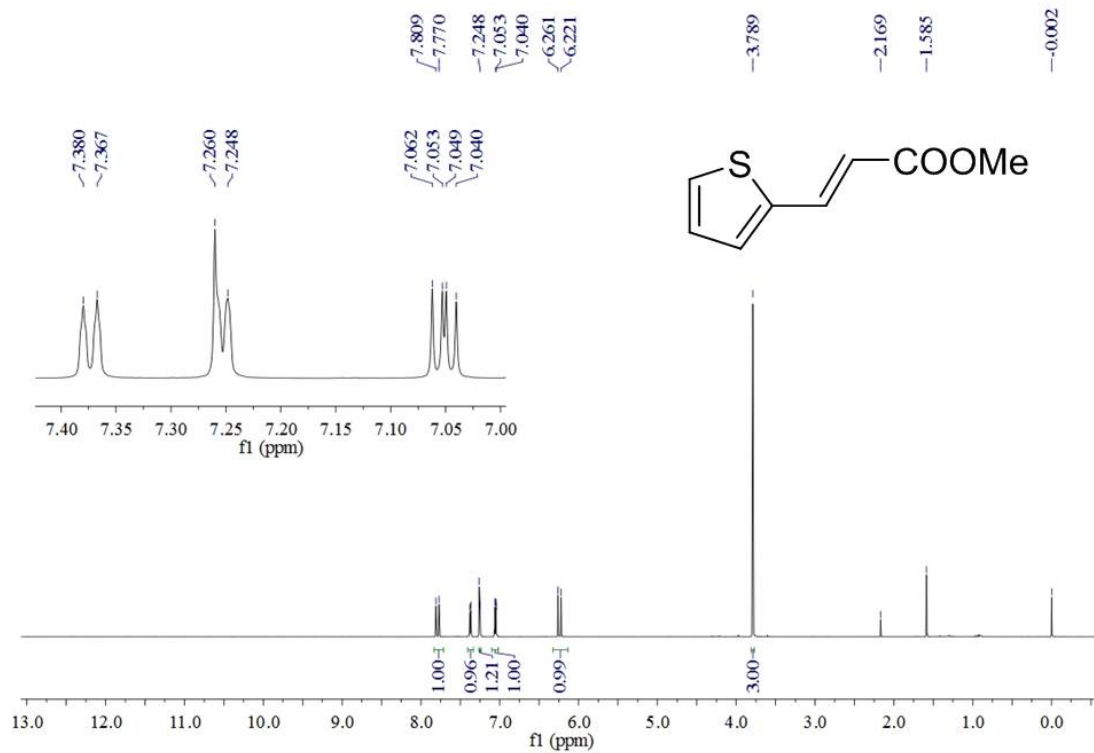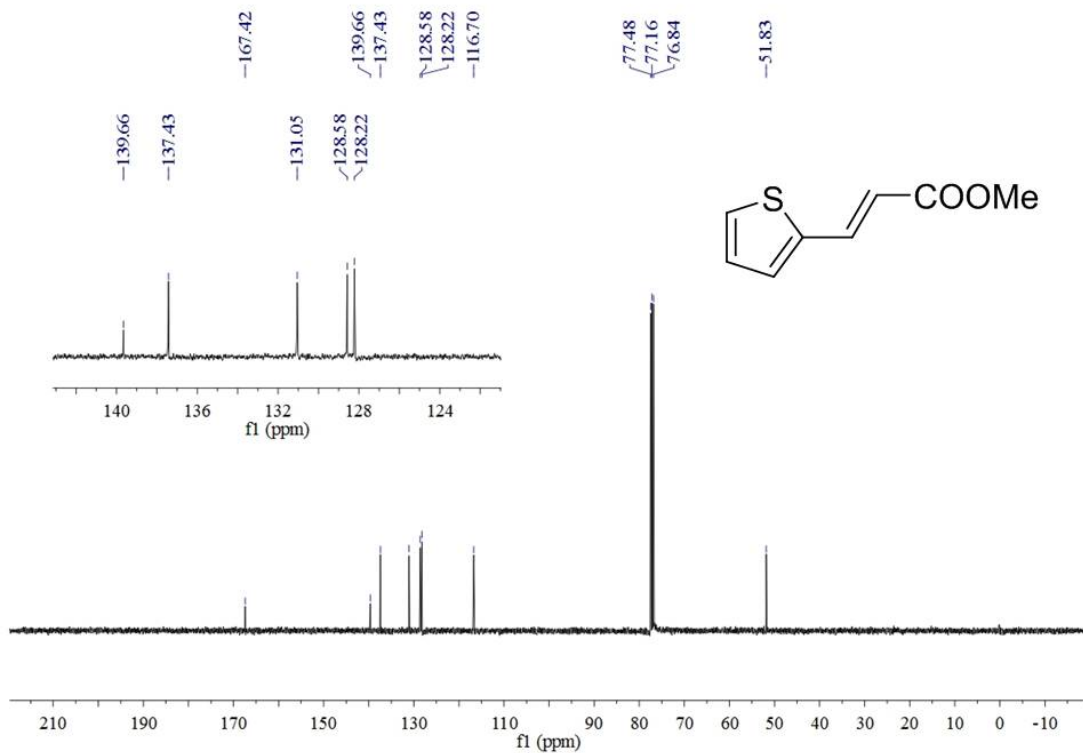

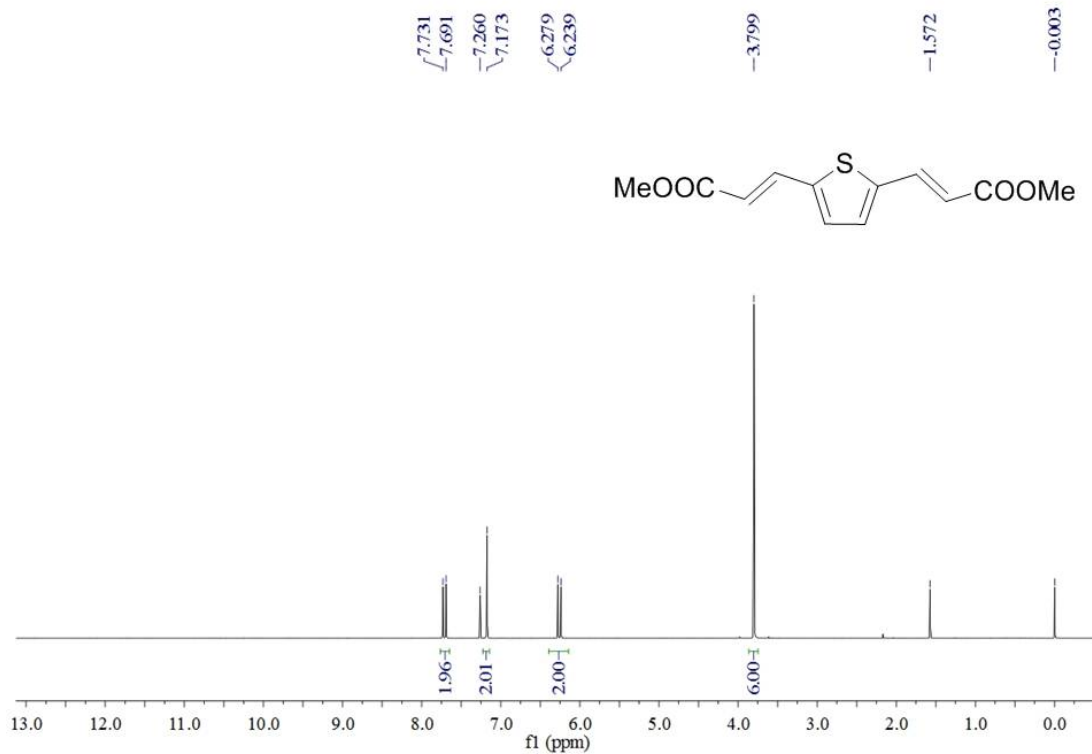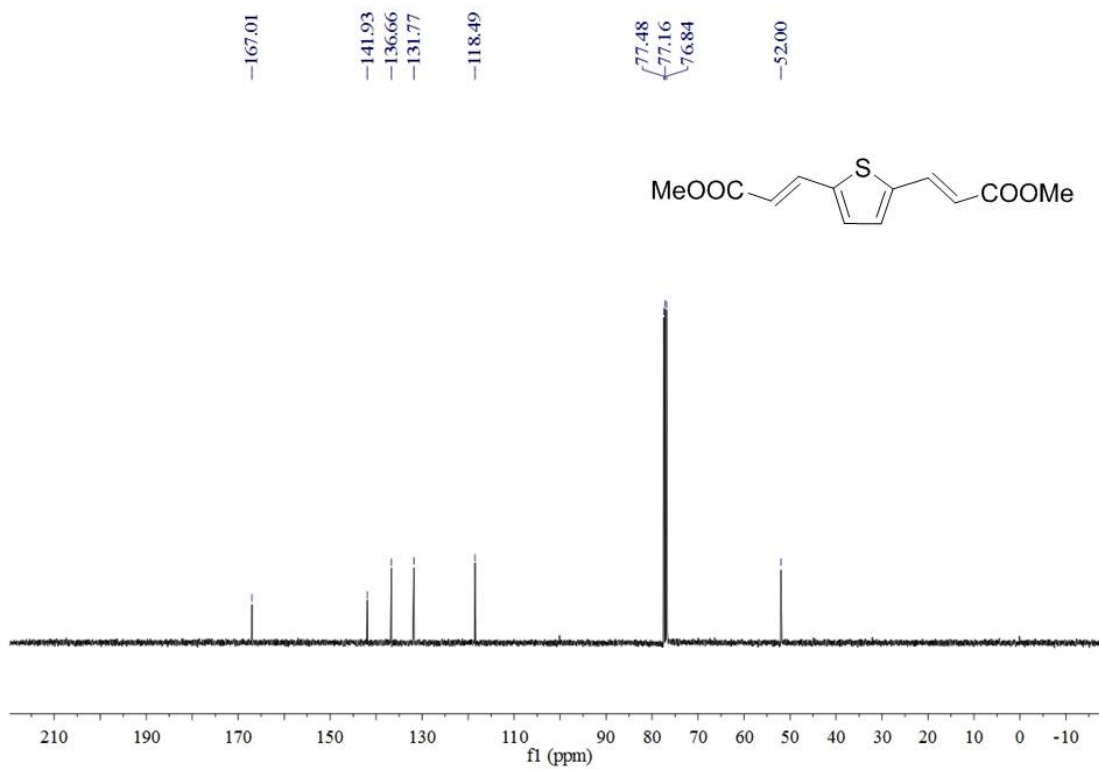

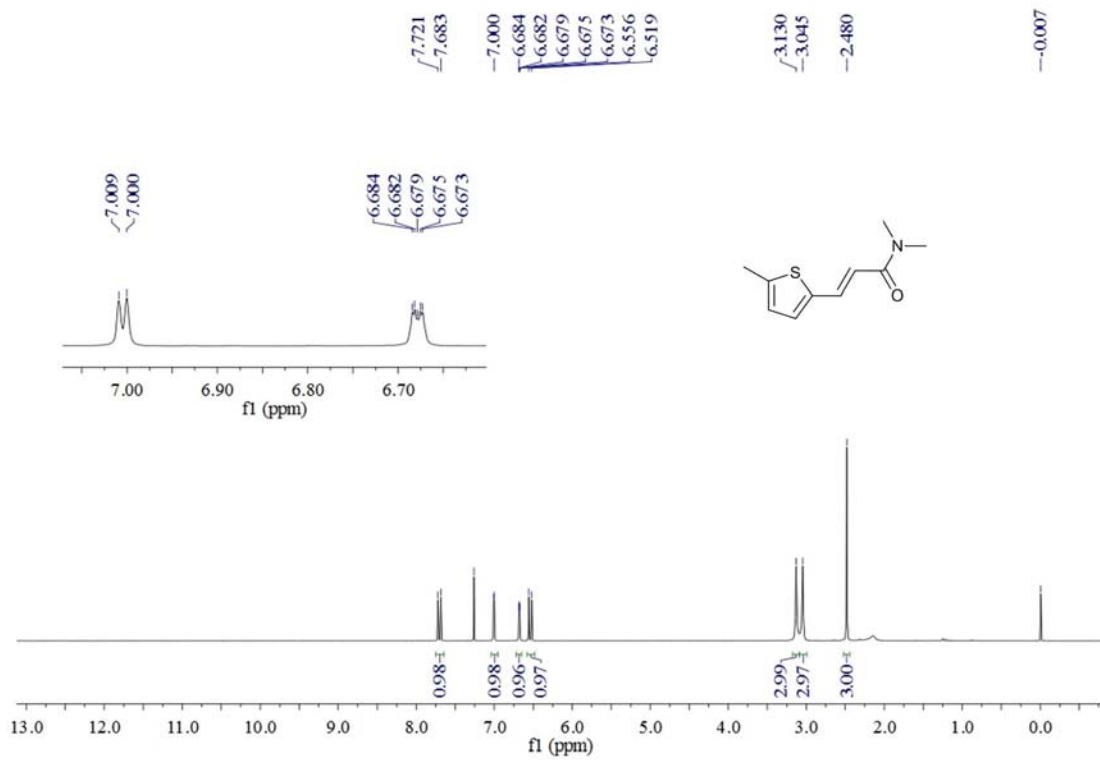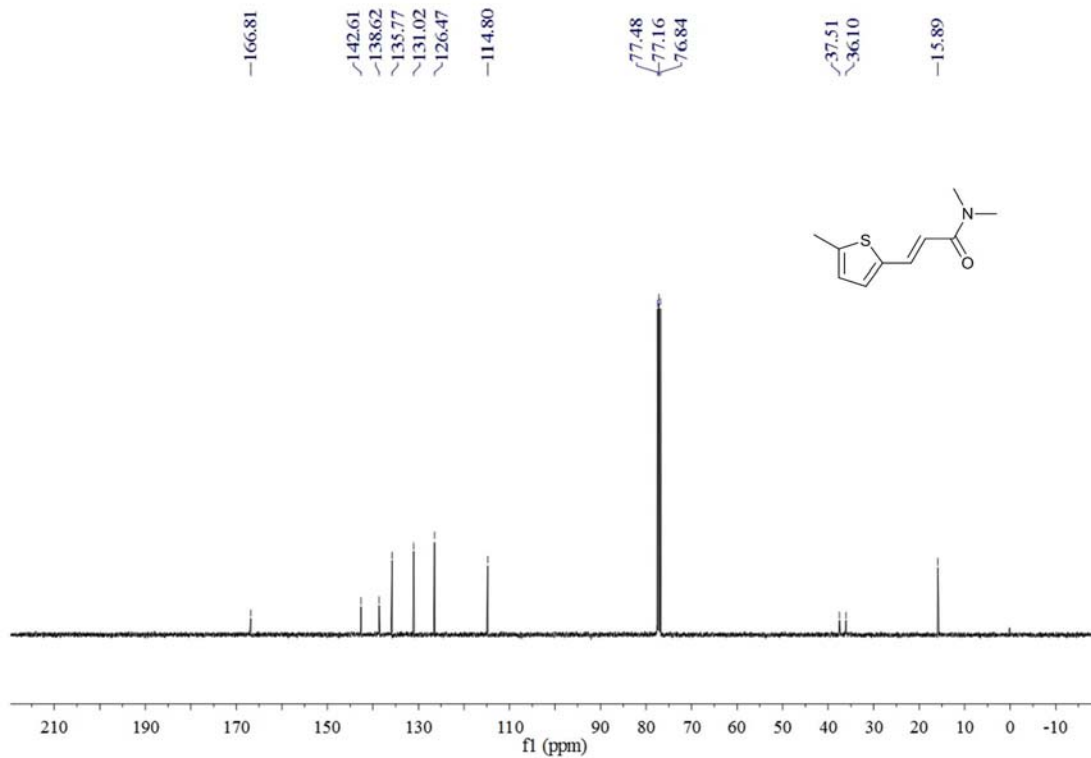

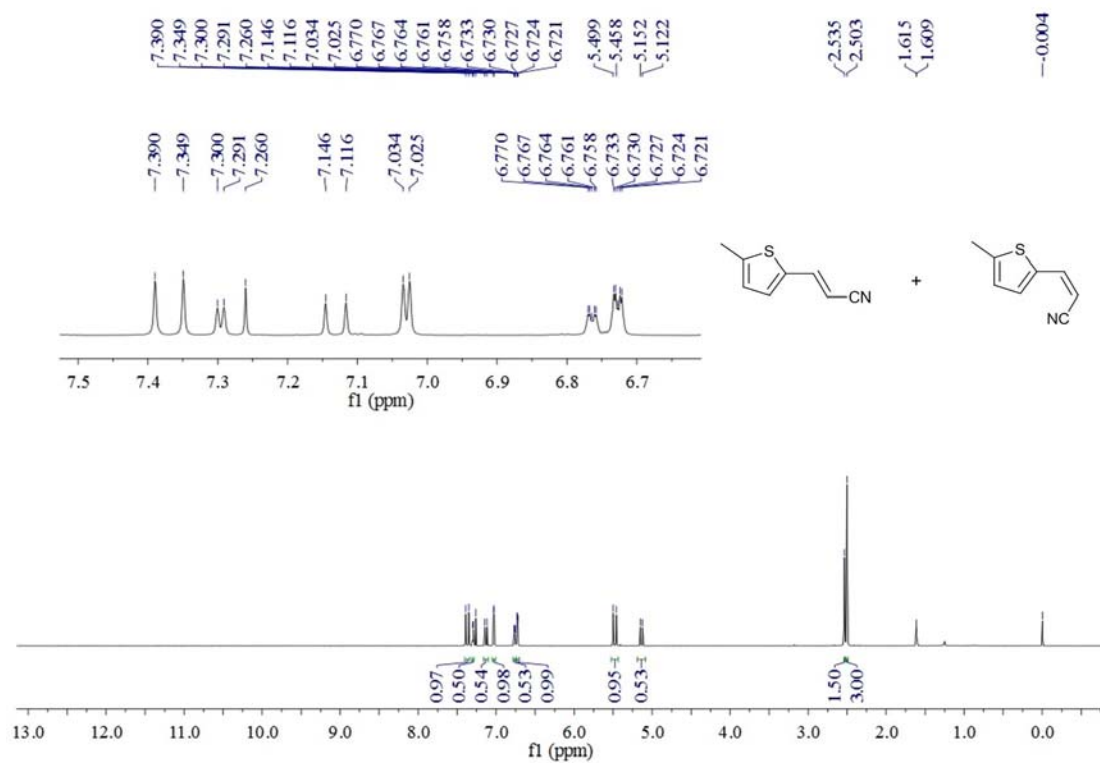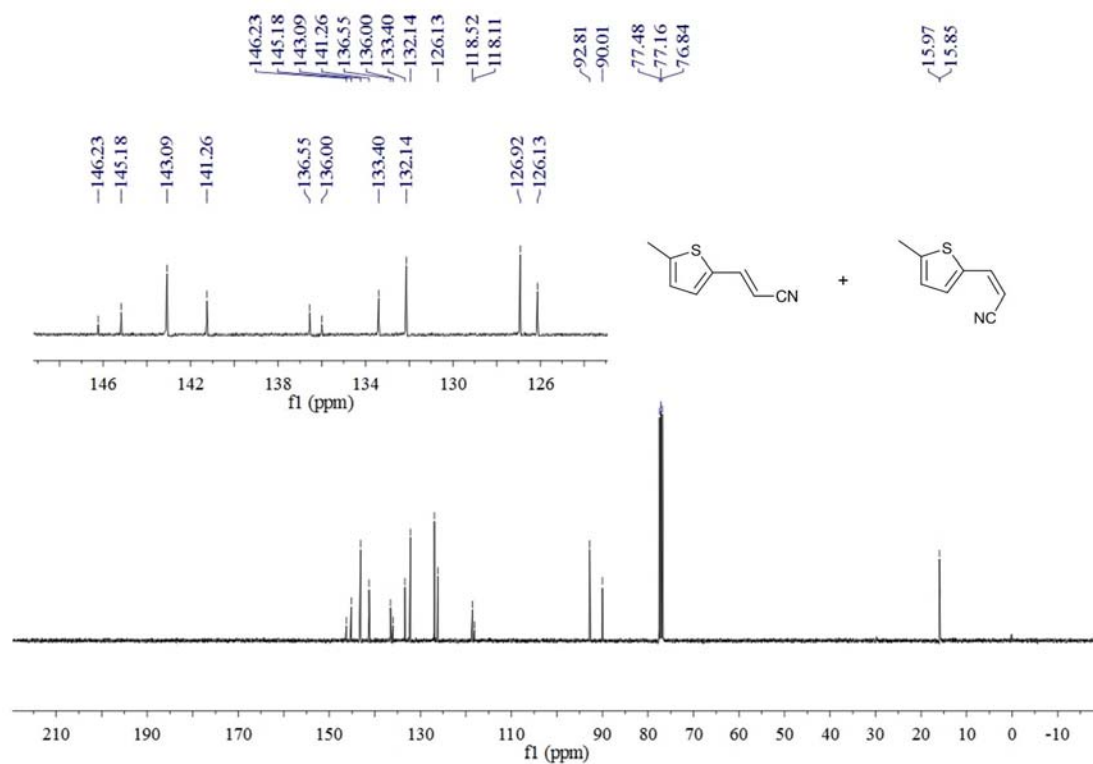

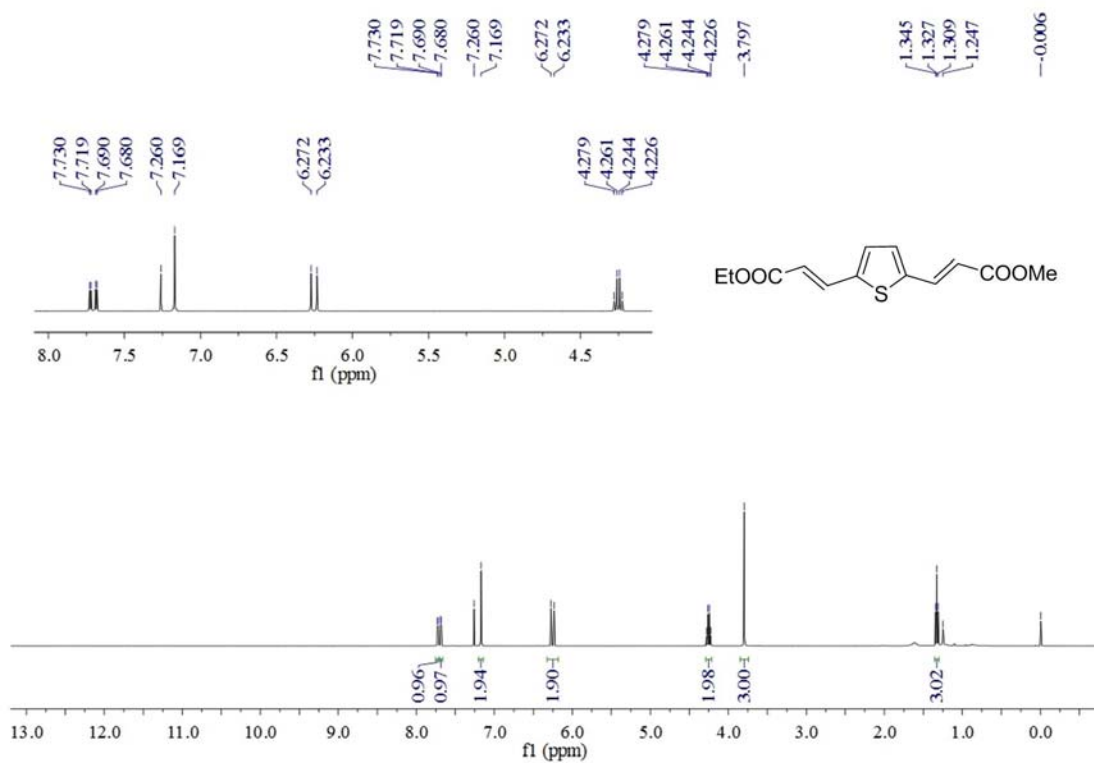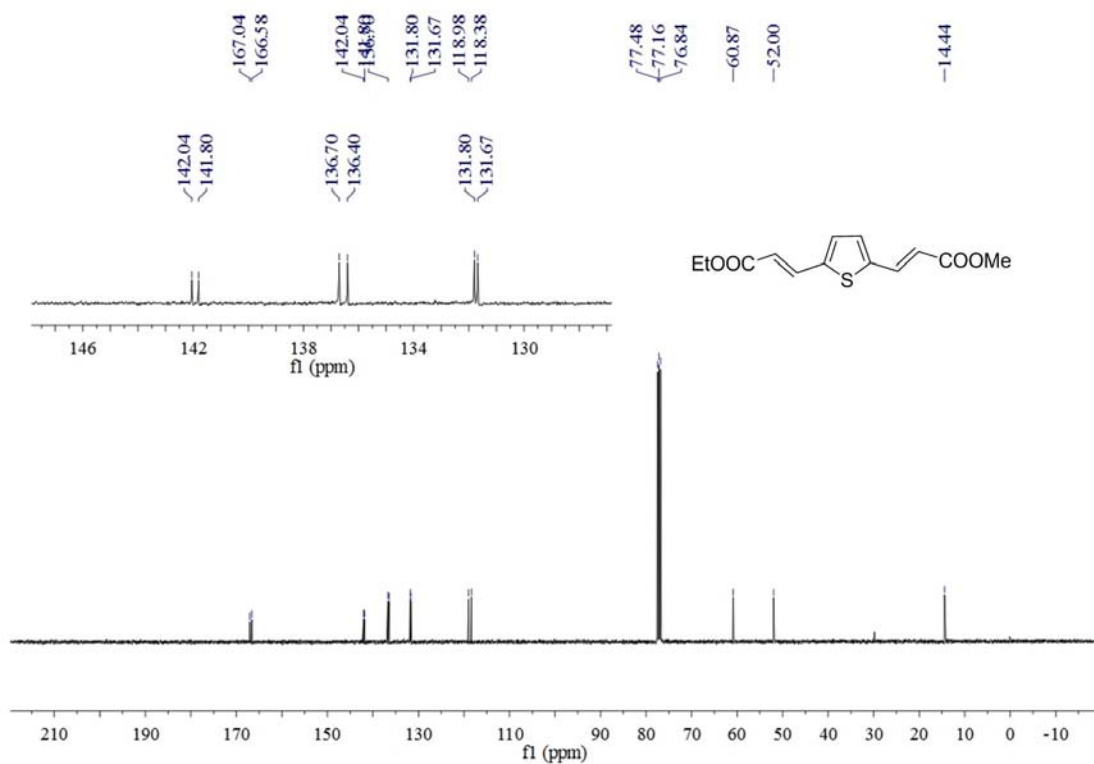

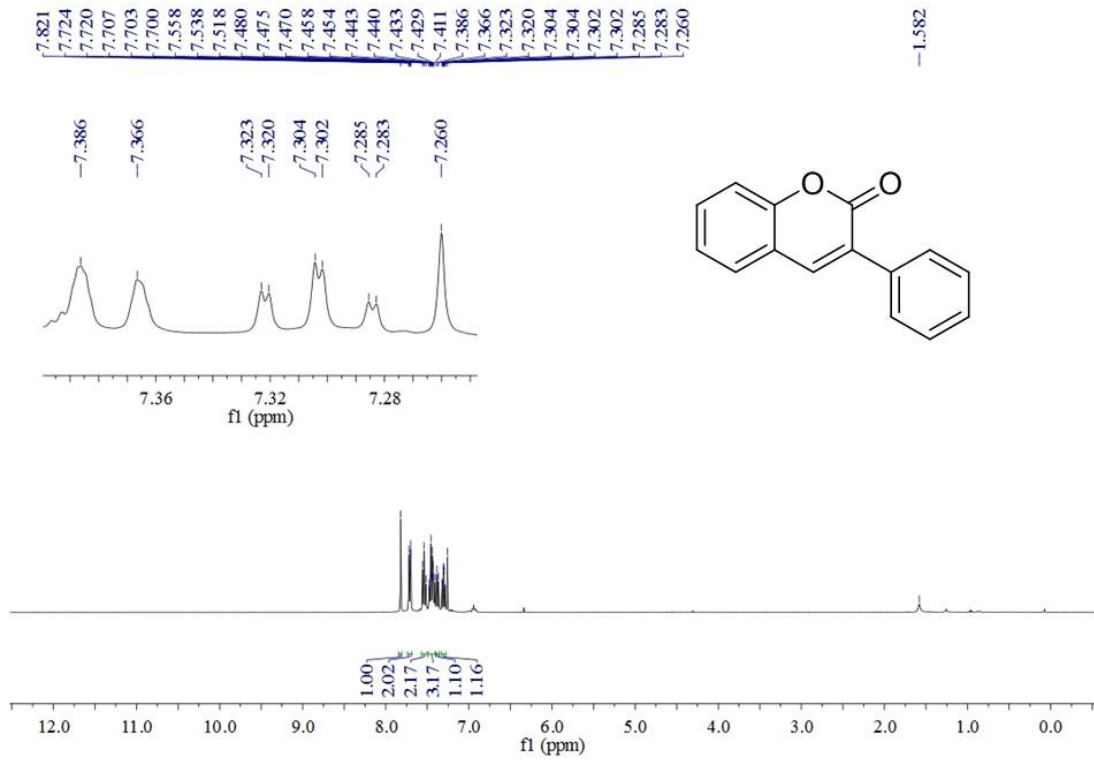

-1.582

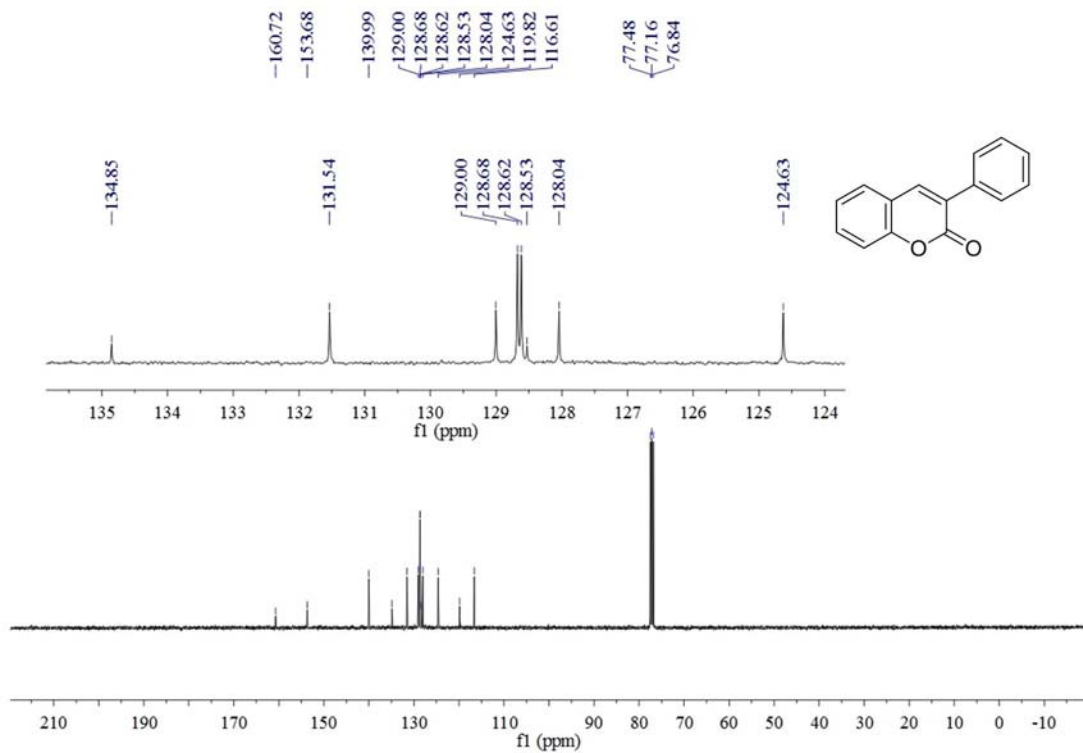

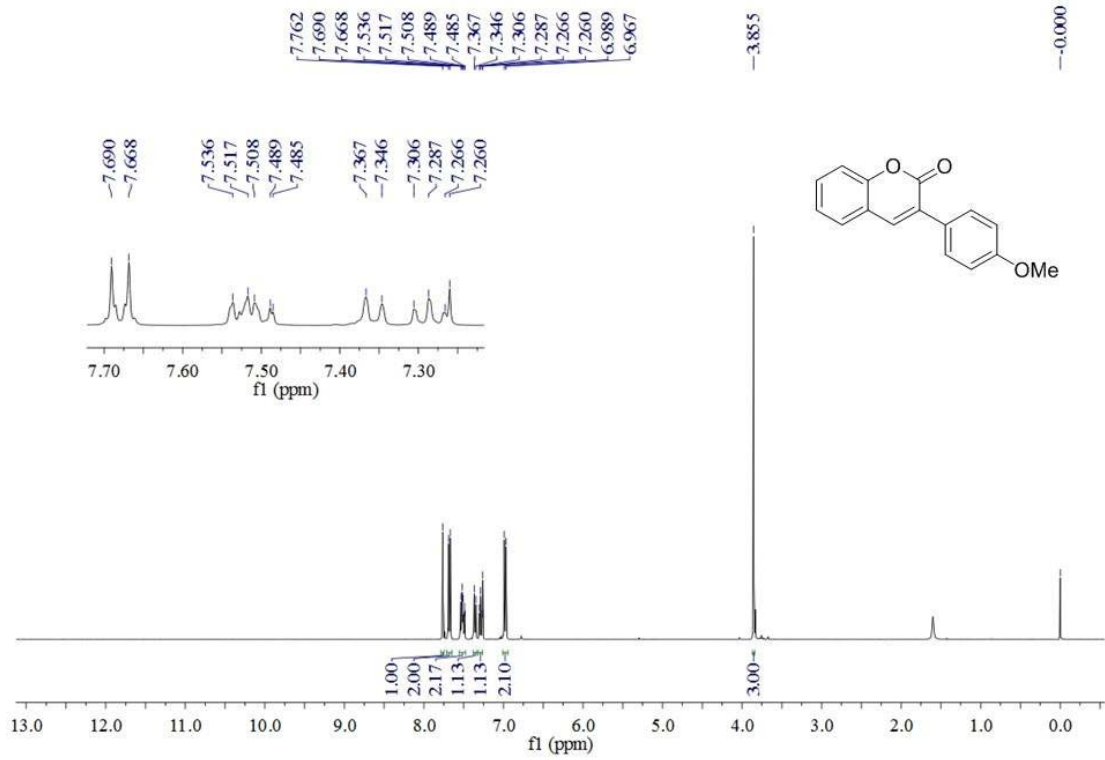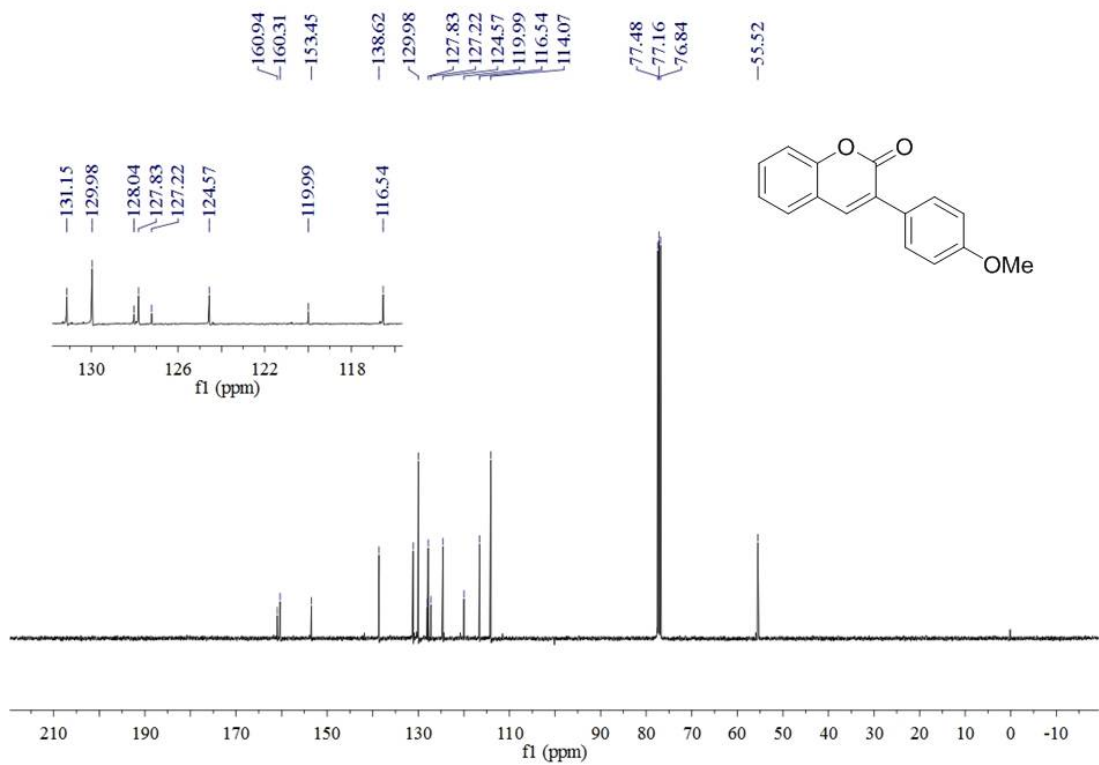

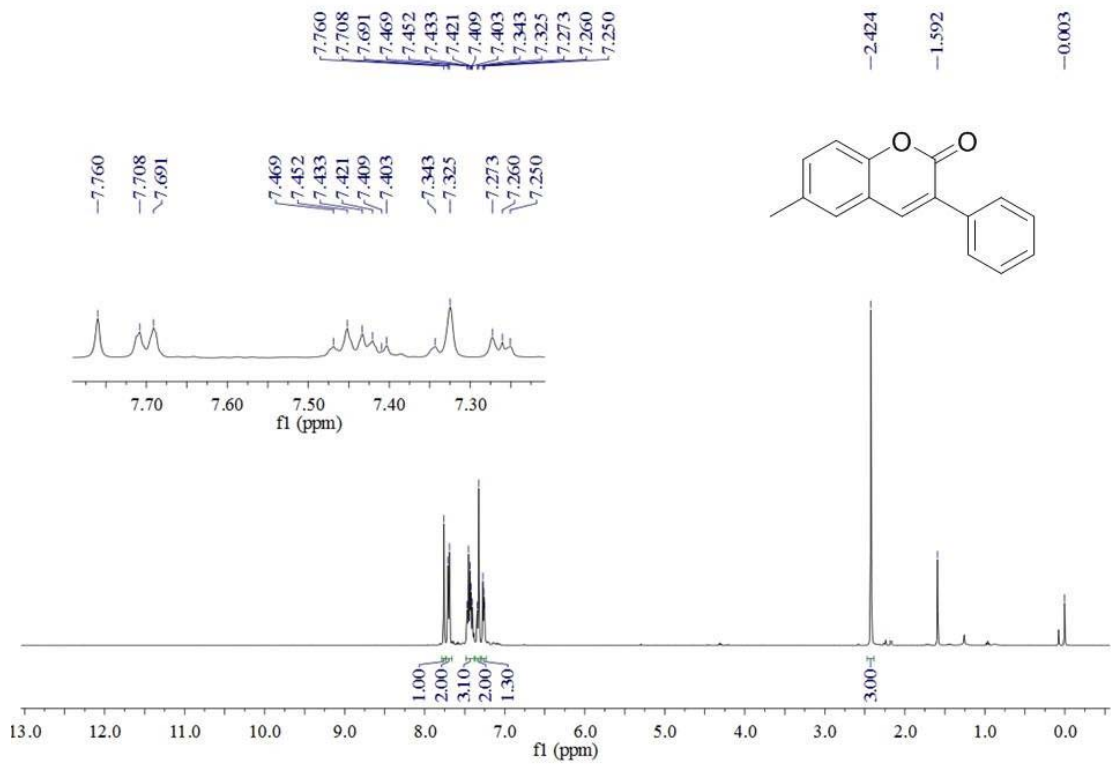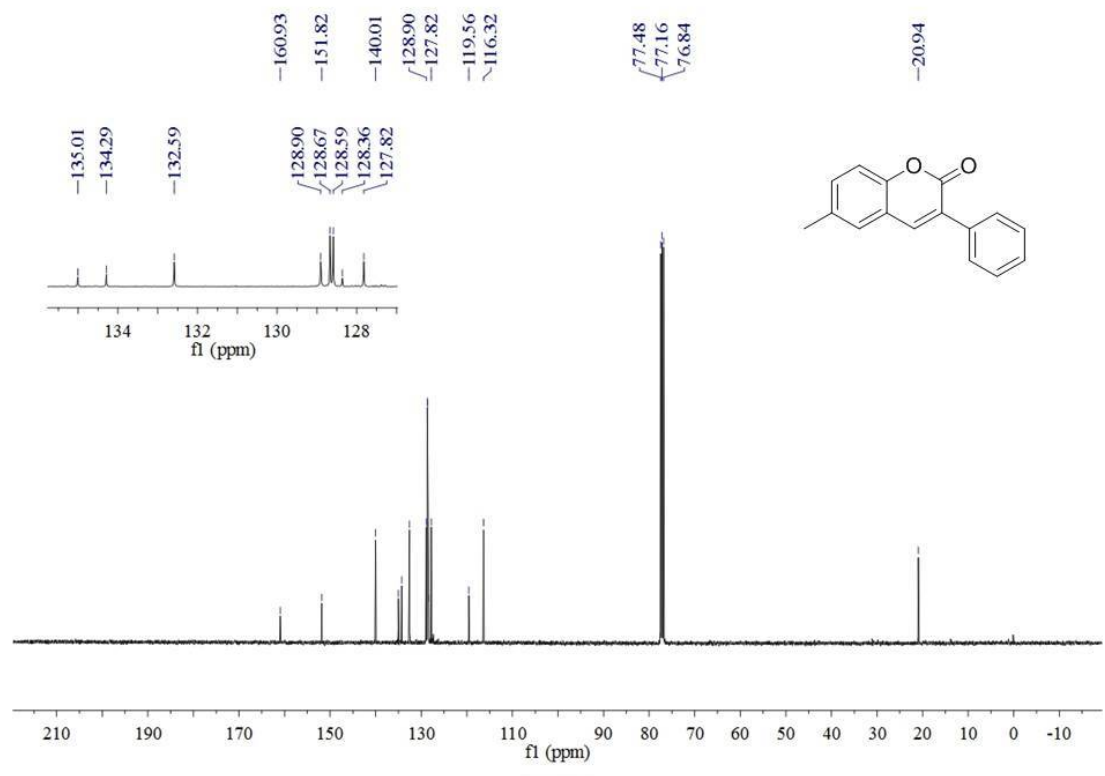



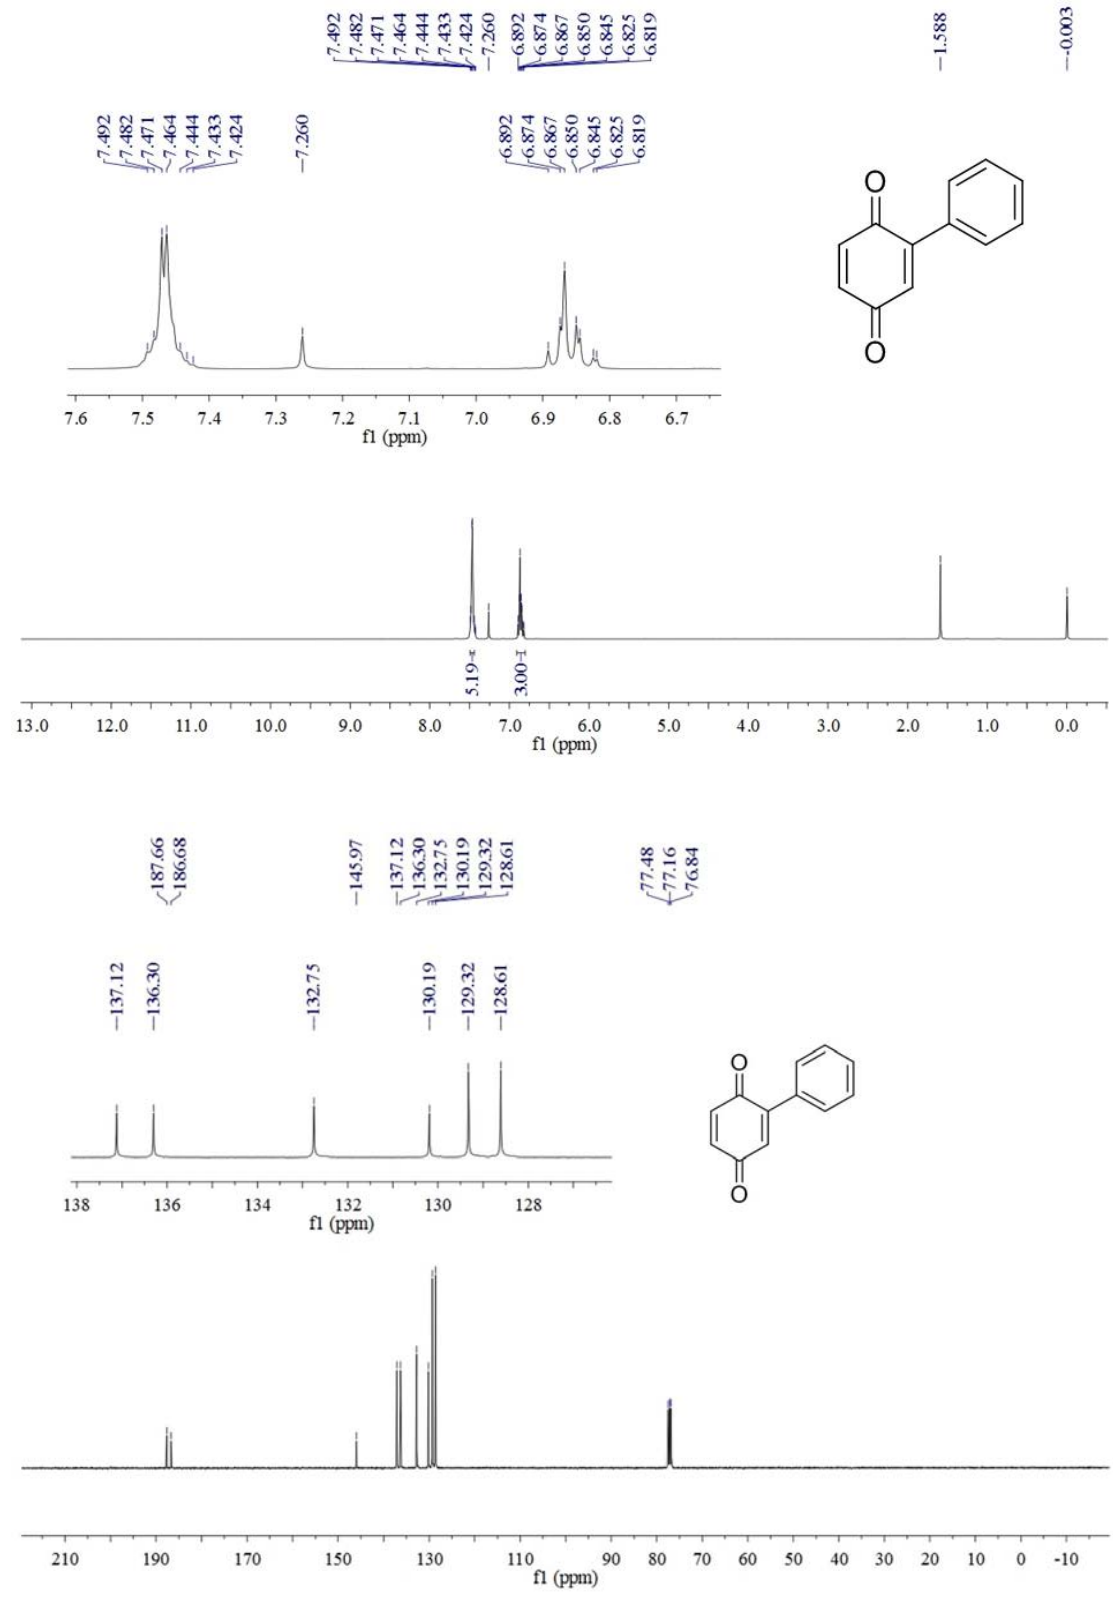

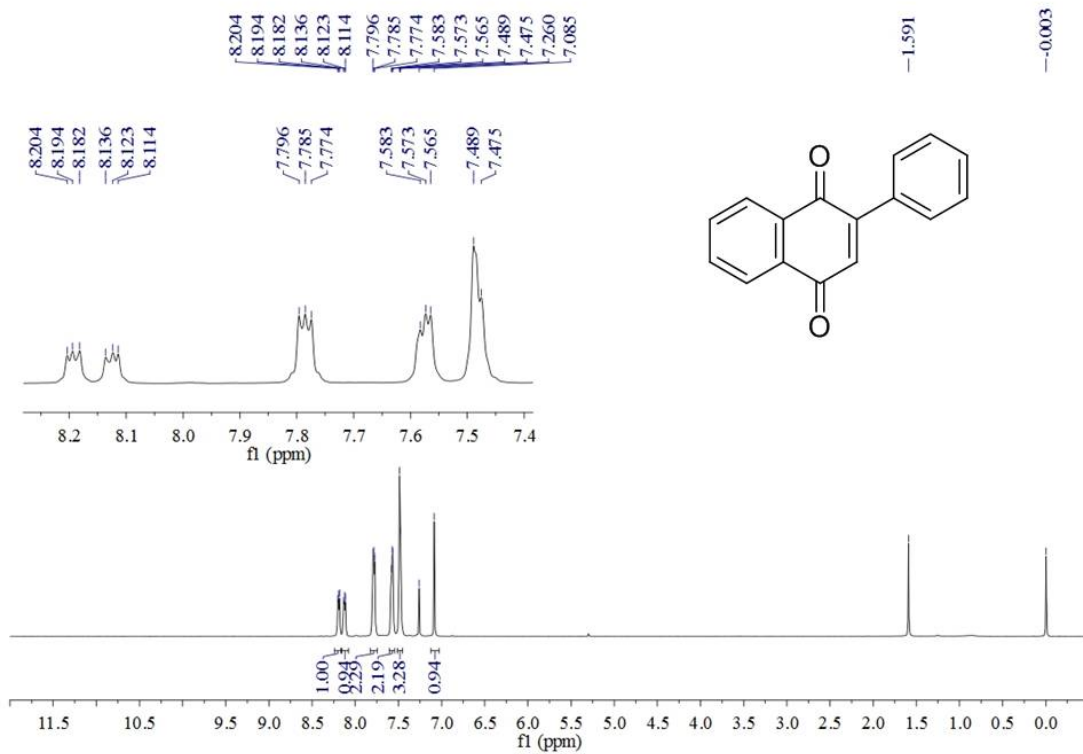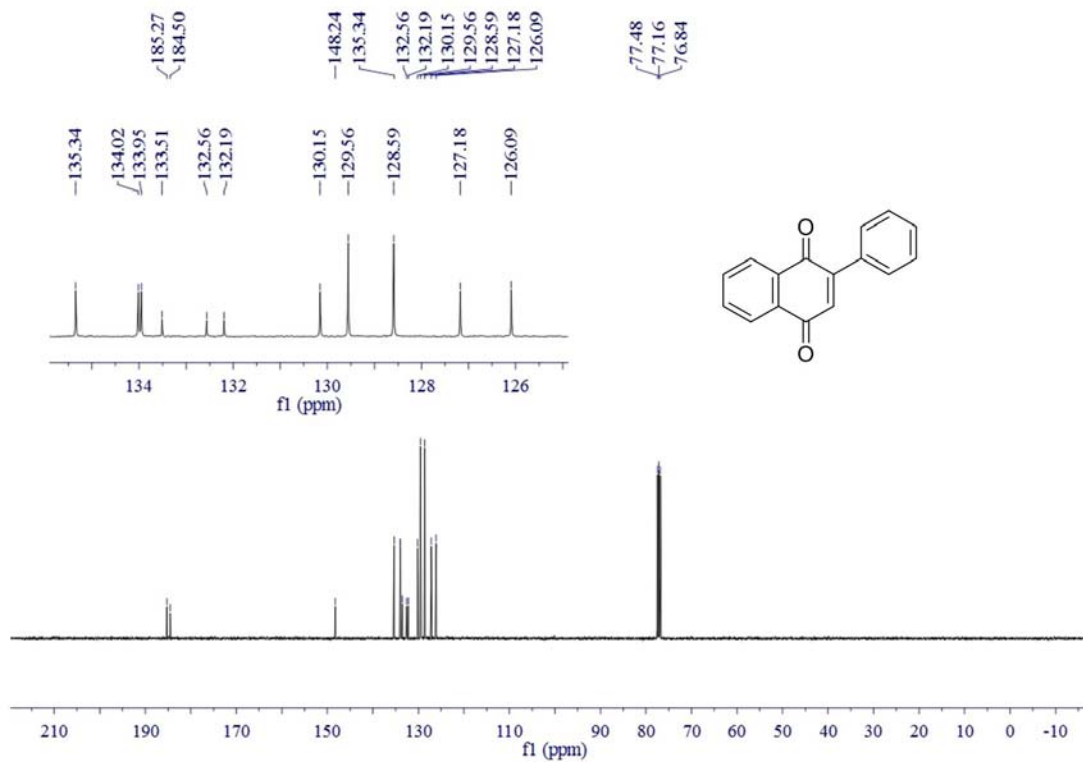

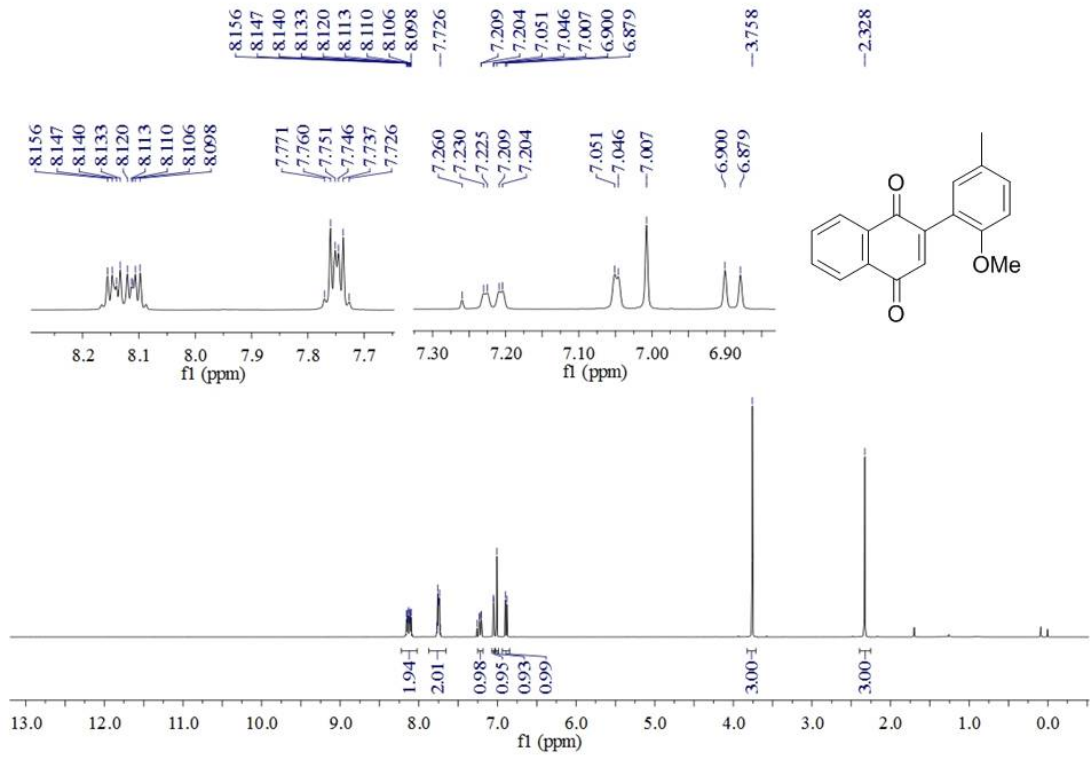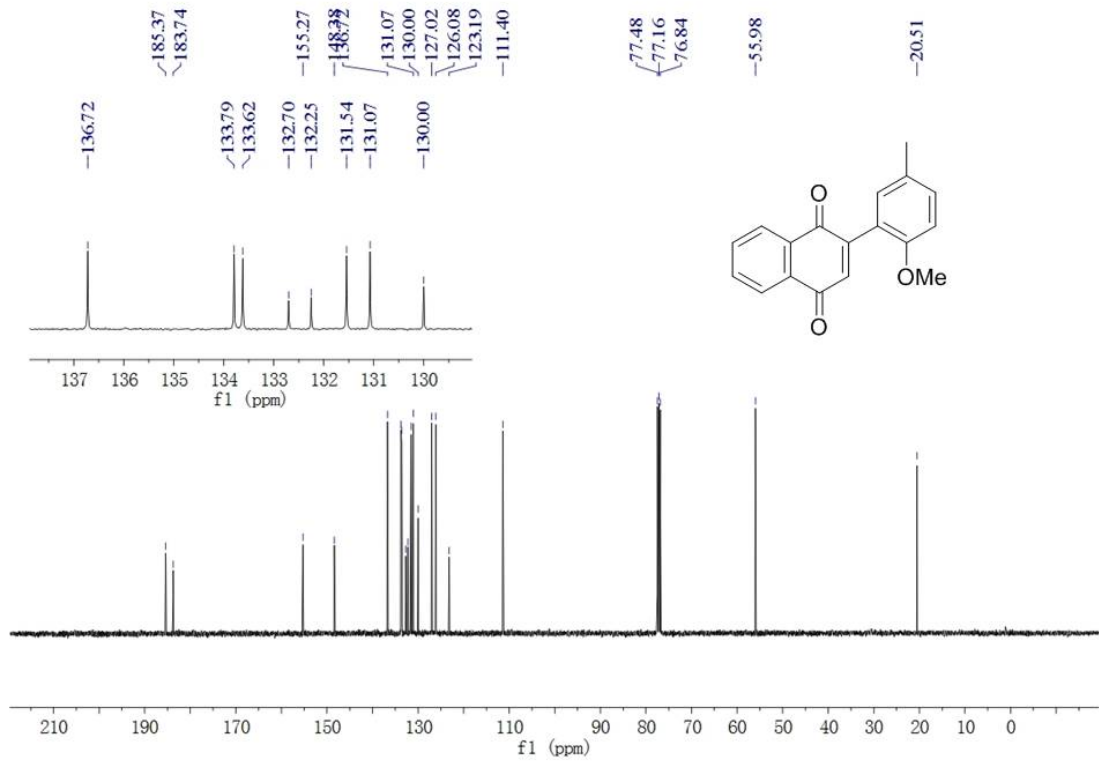

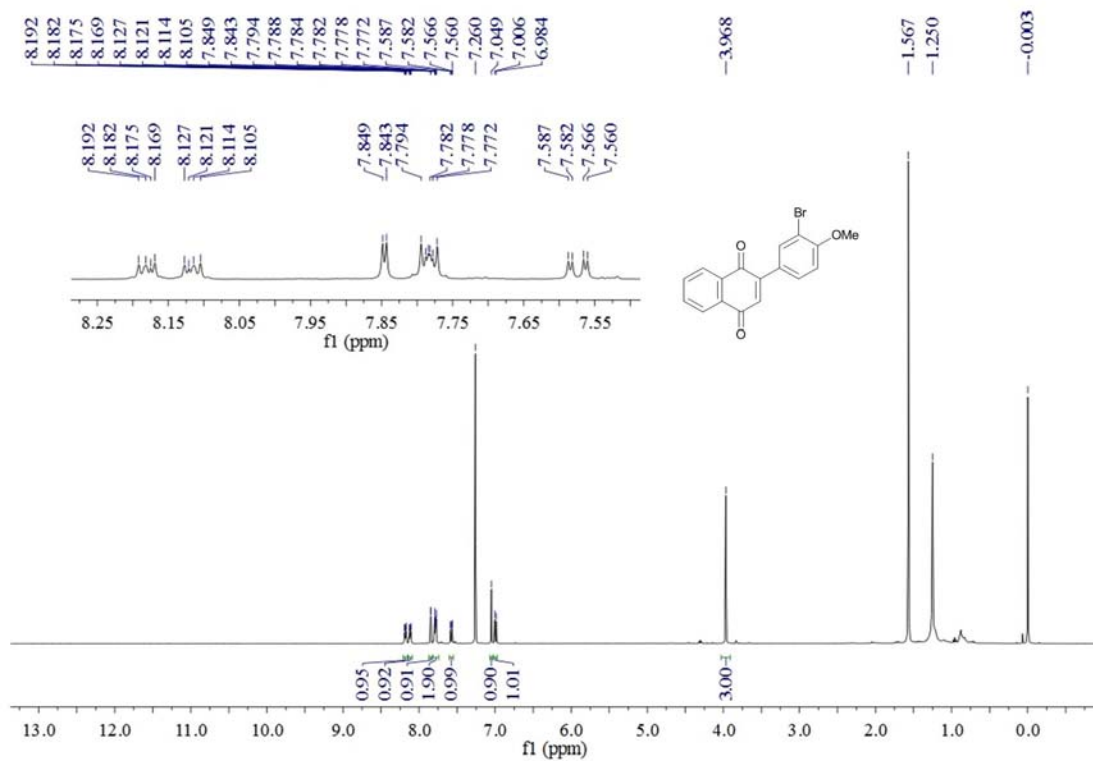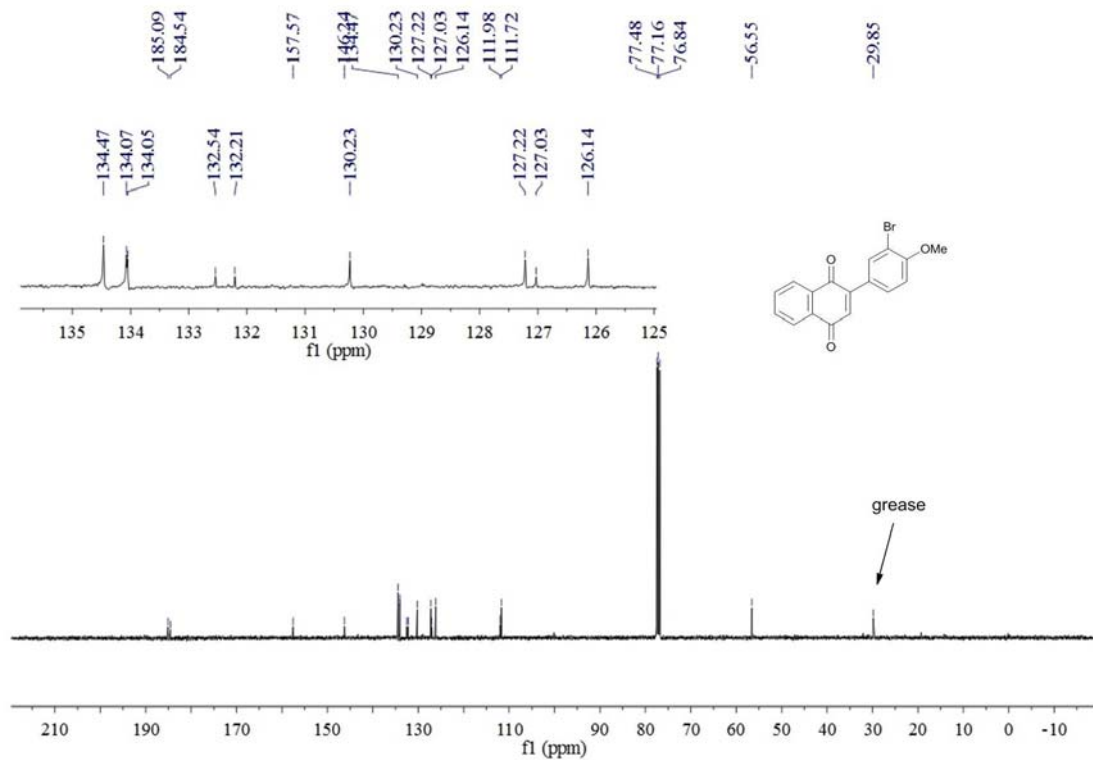

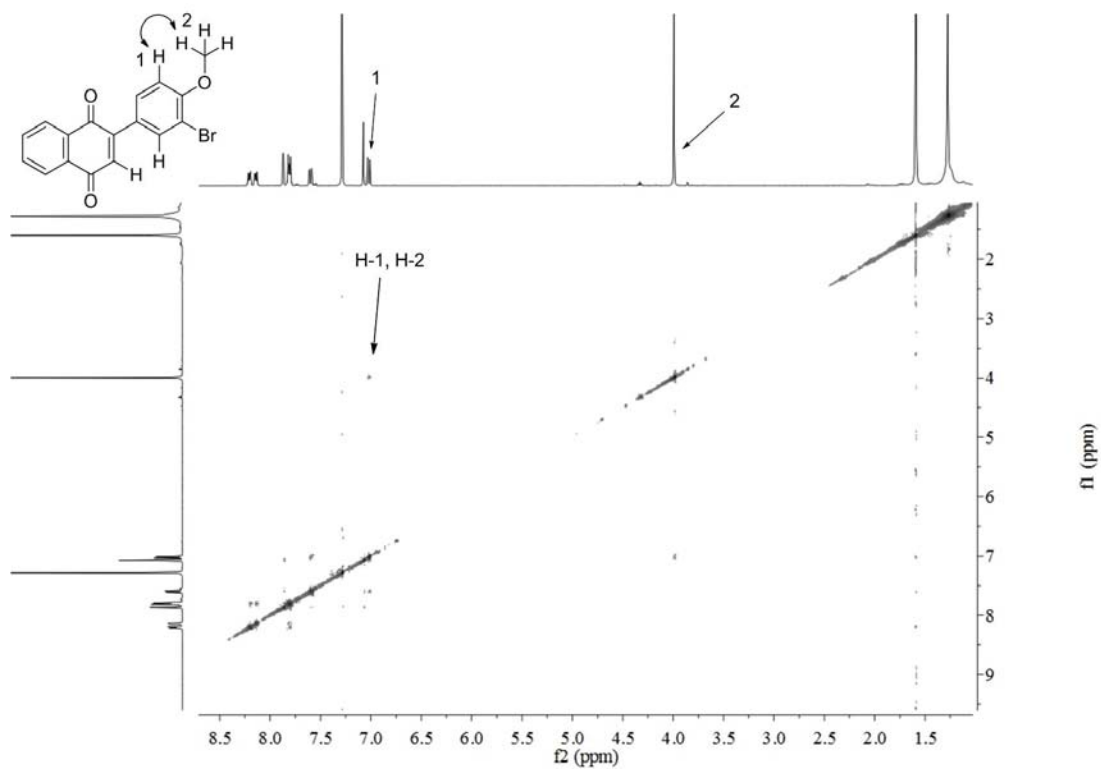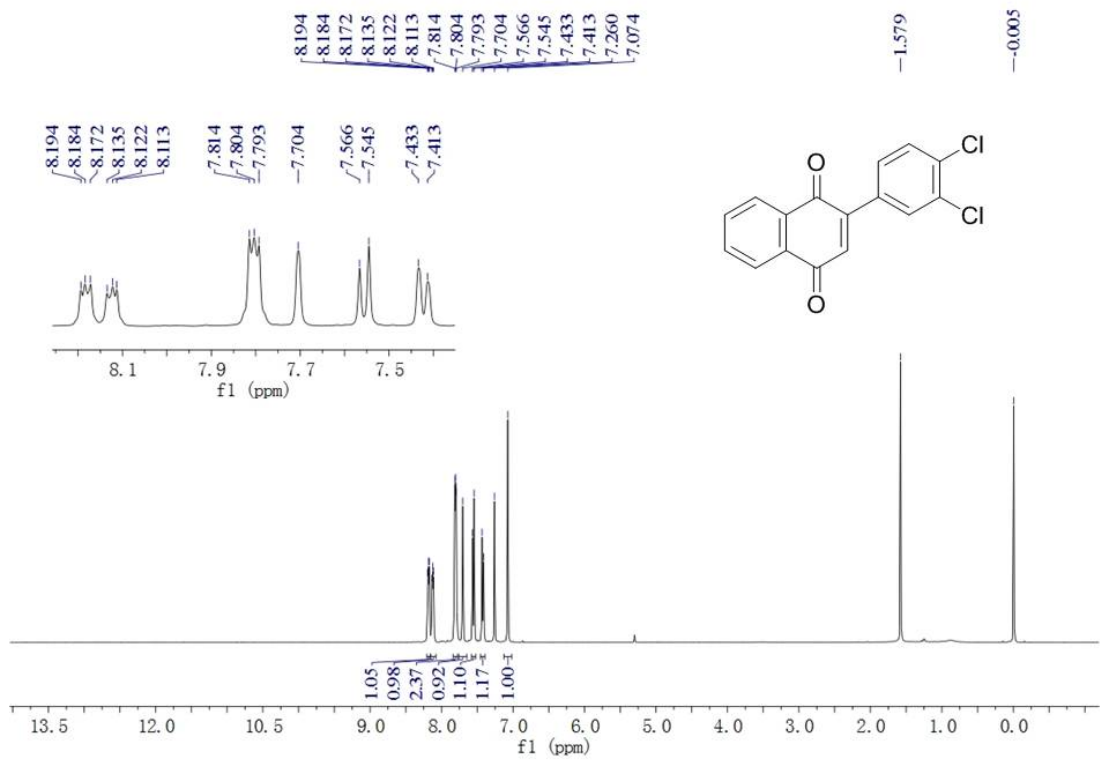

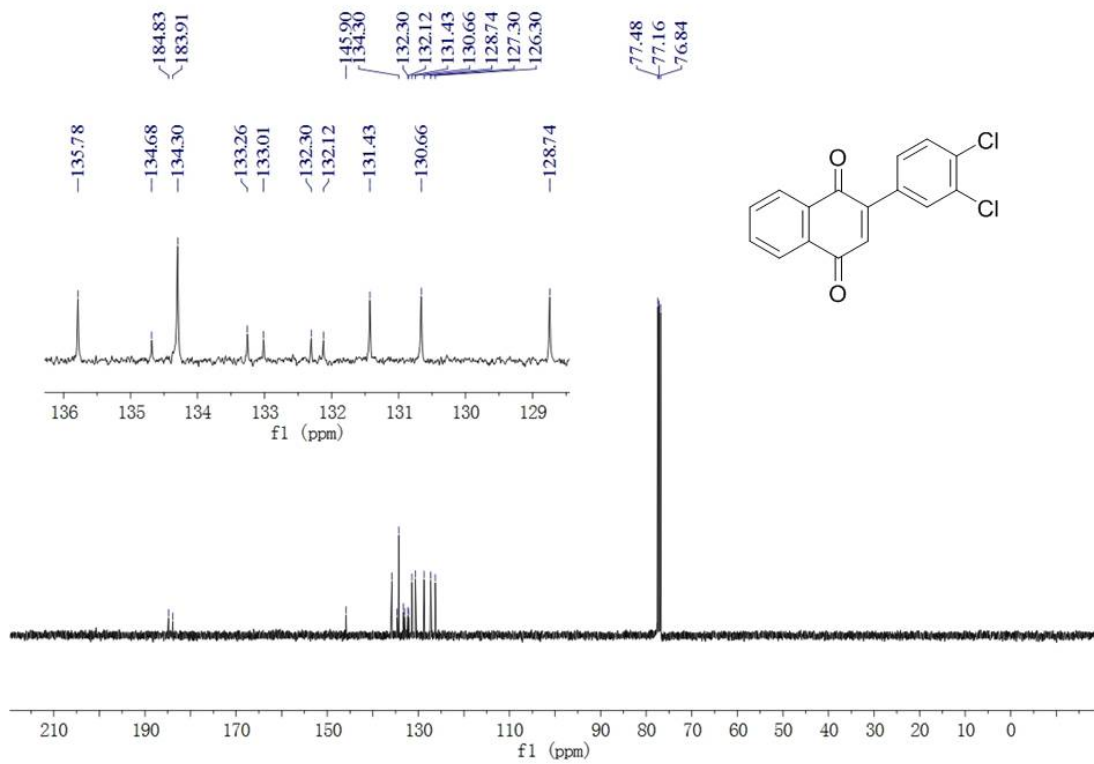

Supplement: c4cc05827e1.pdf [file c4cc05827e1.pdf]
